## 1 Network analysis applied to DASS-21: Emergence of a new dimension

2

3 Marco Antônio Silva Alvarenga <sup>1¶\*#a</sup>, Paulo Felipe Ribeiro Bandeira <sup>2,3¶</sup>, Carolina Souza  
4 Guilhermino<sup>1&</sup>, Tiago Geraldo de Azevedo<sup>1&</sup>, Kelly Fernandes Olímpio<sup>1&</sup>, Camila  
5 Kersul<sup>1&</sup>, Glacithane Lins da Cunha<sup>3&</sup>, Juliana Alves-Teodoro <sup>4¶</sup>, Pricila Cristina Correa  
6 Ribeiro<sup>5¶</sup>, Marcela Mansur-Alves<sup>5¶</sup>, Maycoln Lêoni Martins Teodoro<sup>5¶</sup>

7

8 <sup>1</sup> Departamento de Psicologia. Universidade Federal de São João del-Rei (UFSJ), São João del-  
9 Rei, Minas Gerais, Brazil. Programa de Pós-Graduação em Psicologia (UFSJ)

10 <sup>2</sup> Departamento de Educação Física, Universidade Regional do Cariri, Crato, Ceará, Brazil

11 <sup>3</sup> Programa de Pós-Graduação em Educação Física, Universidade Federal do Vale do São  
12 Francisco (UNIVASF), Petrolina, Pernambuco, Brazil

13 <sup>4</sup> Departamento de Farmácia Social, Universidade Federal de Minas Gerais (UFMG), Belo  
14 Horizonte, Minas Gerais, Brazil

15 <sup>4</sup> Departamento de Psicologia, Universidade Federal de Minas Gerais (UFMG), Belo Horizonte,  
16 Minas Gerais, Brazil. Programa de Pós-Graduação Cognição e Comportamento (UFMG)

17

18 \* Corresponding author

19 E-mail: [alvarenga@ufsj.edu.br](mailto:alvarenga@ufsj.edu.br)

20

21 ¶ These authors contributed equally to this work.

22 & These authors also contributed equally to this work

23

24 #a Current Address: Department of Psychology. Federal University of Sao Joao del-Rei (UFSJ).

25 Praça Dom Helvecio, 74, 2.12B, Dom Bosco, São João del-Rei, Minas Gerais, Brazil

26

27 NOTE: This preprint reports new research that has not been certified by peer review and should not be used to guide clinical practice.

28 **Abstract**

29 The DASS-21 has been studied in different samples and cultures as a brief tool for  
30 screening and referral to specialized interventions, thus presenting the prerogative to be  
31 characterized as a complex system (CS). CS is a new approach to data analysis assumes  
32 that items on a scale are components integrated as a network. Despite this, to date  
33 network analysis has not been applied to verify the psychometric properties of the  
34 DASS-21. This was a non-clinical sample consisting of college students and  
35 professionals (N = 4017), aged 18 years or older (M = 31.16; SD = 10.308), from  
36 different Brazilian regions. The data collection was done through electronic forms  
37 composed by a sociodemographic questionnaire and DASS-21. Participants could  
38 forward the form to other potential respondents. Uni, bi, and multivariate analyses were  
39 used, and, among them, exploratory graph analysis (EGA) and bootstrap EGA  
40 (BootEGA). EGA e BootEGA generated a model with four factors. The four-factor  
41 model from DASS-21 showed better fit rates compared to the others replicated in this  
42 research. The new four factor model has excellent composite reliability and is invariant  
43 regard to gender and type of activity performed. This research was composed of a non-  
44 probabilistic and convenience sample, without equitable geographical distribution of the  
45 participants and whose answers to this study were provided only by the web-based  
46 forms. The DASS-21 presented a new factor model composed of four distinct  
47 dimensions with excellent intrinsic features.

48

49 **1. Introduction**

50 The short form of the Depression, Anxiety and Stress Scale (DASS-21) is a widely used  
51 self-report instrument to assess affective-emotional changes related to mood and anxiety  
52 [1-3]. This version presents a model with good discrimination among symptoms related

53 to depression, anxiety and stress in clinical and non-clinical samples [4-6] comprised of  
54 adolescents [7,8] college students [9,10] healthcare professionals [11] psychoactive  
55 substance users [12] and athletes [13]. The depression subscale features items related to  
56 moodiness, hopelessness and lack of motivation; the anxiety subscale reports response  
57 promptness and physical changes; and the stress subscale refers to persistent tension,  
58 irritability and a poor tolerance for frustration [14].

59 As of the time of writing this article, DASS-21 has been adapted for at least 55  
60 different linguistic-cultural contexts across all continents [15]. There is research on this  
61 scale in Oceania [16], Africa [17-19], America [14, 20-24] and Eurasia [25-36]. Thus,  
62 DASS-21 has become a widely used instrument to assess the severity of burden and  
63 affective changes. Despite the consistency of the results found in the investigations  
64 carried out, there is divergence about the dimensional structure of this instrument.

65 Exploratory factor analysis (EFA) and confirmatory factor analysis (CFA) have  
66 been the methods most used to verify the psychometric properties of the scale [2], often  
67 indicating a three-factor model. However, other models for DASS-21 have been  
68 reported from such analyses. Henry and Crawford [5], for example, have shown a  
69 model expressed by three factors (represented by items from the depression, anxiety and  
70 stress subscales) and also by a single factor (general psychological distress), calling it a  
71 bifactor model. Uni- and bidimensional models are also described in the literature: some  
72 items from the depression and anxiety subscales are taken to form just one dimension  
73 [37] the depression and anxiety subscales are classed as one dimension and the stress  
74 subscale as another [38] the depression and stress subscales are classed as one  
75 dimension and the anxiety subscale as another [23]; the anxiety and stress subscales are

76 classed as one dimension and the depression subscale as another [39,40] and a  
77 bidimensional model expressed by two dimensions distinguished from those previously  
78 mentioned – physiological arousal and generalized negativity [41].

79         Some recent studies have employed other methods for analyzing DASS-21,  
80 namely the exploratory structural equation model (ESEM: [16, 42] and the bifactor  
81 ESEM (BESEM: [2]. ESEM has the advantage of combining EFA and CFA in such a  
82 way that the dimensions described are not related to each other [43]. Using ESEM, both  
83 Johnson et al. [16] and Kyriazos et al. [42] evidenced a three-dimensional model for  
84 DASS-21 versions with different numbers of items. BESEM makes it possible to  
85 combine two simultaneous analysis methods for a bifactor approach [44]. However,  
86 Gomez et al. [2]. demonstrated that a general factor model was more satisfactory when  
87 they applied this method to DASS-21.

88         Other analyses provide evidence for maintaining the dimensional structure of the  
89 scale across different groups, such as the factor invariance calculation [45,46]. This  
90 technique has been applied to DASS-21 and has shown factor invariance for the three-  
91 dimensional model across a diverse group of college students [47]: from different  
92 countries [24, 48], gender [29, 49], age groups [35, 50] and for the full and nine-item  
93 versions of the scale for a non-clinical sample [42]. Other studies have reported  
94 invariance for the bifactor model between clinical and non-clinical samples [51] and  
95 among different countries [52].

96         Despite the variety of methods applied to DASS-21, this instrument has not yet  
97 undergone an analysis based on complex systems and network science. In several areas,  
98 phenomena are investigated as systems that, owing to their sensitivity to initial

99 conditions, non-linearity, emergent behavior and self-organization, can be classified as  
100 complex [53]. Psychometric research has presented this perspective in different fields of  
101 study in recent years, such as in psychopathology [54], persistent somatic symptoms  
102 [55], major depression [56] and anxiety and depression symptoms [57]. The network  
103 perspective investigates the multivariate data structure of DASS-21 in different  
104 situations, for example, by investigating associations between variables, identifying  
105 more important and intervention-sensitive variables from centrality indices and  
106 exploring the dimensional structure of the psychological scales [58].

107 Exploratory graph analysis (EGA) and bootstrap EGA (BootEGA) are two  
108 different types of network analysis. EGA and BootEGA were developed to estimate the  
109 number of dimensions in multivariate data using non-directional network models  
110 [59,60]. These analyses are part of a new perspective known as “network  
111 psychometrics”. Under this approach, attributes are conceptualized as causally linked  
112 variables (observable) that form an emergent network pattern or topology. This means  
113 that the organization of items is characterized as a complex system according to  
114 contextual variables [58]. Considering all the above, this research aims to employ  
115 contemporary (EGA and BootEGA) and traditional (CFA, composite reliability and  
116 factor invariance) analyses to DASS-21.

117

## 118 **2. Methods**

### 119 **2.1. Study design**

120 This is a descriptive, correlational and quantitative research analysis because it  
121 represents the characteristics of the sample without having control over the variables  
122 described, understanding the correlations (whether linear or in a complex system)

123 among those variables and establishing parameters for comparison from the  
124 observations that have been made [61]. It is a cross-sectional study employing the  
125 snowball technique to increase the sample size [62], with a non-probability sample type  
126 since there was no randomization for the selection of participants [63].

127

## 128 **2.2. Participants**

129 The minimum sample size was calculated using G\*Power 3.1 software for iOS [64],  
130 adopting the parameter test of variance equality (two-sample case: ratio  
131  $\text{variance1/variance0} = 1.5$ ) because usually there are twice as many females as males in  
132 studies involving DASS-21 (see 40, 64,65). We further adopted the recommendations of  
133 a sample consisting of 10 respondents per item but 25 for more conservative analyses  
134 and for CFA [45] and EGA [59]. The minimum sample comprised 714 participants, 416  
135 of which were females.

136 Participants included were 18 years of age or older and a current student or  
137 professional from any of the five Brazilian regions. We excluded the following:  
138 incidental responses from different profiles intended in this research; participants who  
139 did not complete the DASS-21; and self-reported psychiatric and/or neurological  
140 diagnosis in the last two months from the date of response.

141 This study comprised 4017 people with a mean age of 31.16 years (SD =  
142 10.308). Most participants were female (N = 2791, 60.5%), college students (70.3%),  
143 self-described as Caucasian (60.8%) or brown (29.1%), single (63.0%) and with a  
144 monthly household income of 2–10 minimum wages (58.6%). Many participants did  
145 not disclose which Brazilian region they lived in (70.4%); however, among the  
146 respondents, most reported living in the Southeast region (76.4%). The mean of the  
147 DASS-21 total score was 23.98 (SD = 15.33) for the overall sample, with a significant

148 mean difference for all items and for the DASS-21 total score between genders, with  
149 minimum to moderate effect size (see Table 1).

150 **Table 1. Descriptive Analysis of Sociodemographic Characteristics and DASS-21**  
151 **items between Gender of the Participants**

medRxiv preprint doi: <https://doi.org/10.1101/2022.07.29.22274986>; this version posted July 31, 2022. The copyright holder for this preprint (which was not certified by peer review) is the author/funder, who has granted medRxiv a license to display the preprint in perpetuity. All rights reserved. No reuse allowed without permission.

|                                                                                                                                 | n    | %    | M     | SD    | sk     | kt     | n   | %    | M     | SD     | sk    | kt   |
|---------------------------------------------------------------------------------------------------------------------------------|------|------|-------|-------|--------|--------|-----|------|-------|--------|-------|------|
| Age                                                                                                                             |      |      | 30.75 | 9.962 |        |        |     |      | 32.10 | 11.002 |       |      |
| Type of activity performed                                                                                                      |      |      |       |       |        |        |     |      |       |        |       |      |
| College student                                                                                                                 | 1987 | 71.2 |       |       |        |        | 839 | 68.5 |       |        |       |      |
| Professionals                                                                                                                   | 804  | 28.8 |       |       |        |        | 387 | 31.5 |       |        |       |      |
| Education                                                                                                                       |      |      |       |       |        |        |     |      |       |        |       |      |
| Bachelors                                                                                                                       | 1246 | 44.6 |       |       |        |        | 517 | 46.2 |       |        |       |      |
| Bachelor's degree                                                                                                               | 602  | 21.6 |       |       |        |        | 211 | 17.2 |       |        |       |      |
| Postgraduate degree/MBA                                                                                                         | 78   | 2.8  |       |       |        |        | 93  | 7.6  |       |        |       |      |
| Incomplete master's                                                                                                             | 248  | 8.9  |       |       |        |        | 95  | 7.7  |       |        |       |      |
| Master's Degree                                                                                                                 | 261  | 9.4  |       |       |        |        | 111 | 9.1  |       |        |       |      |
| Incomplete doctorate                                                                                                            | 233  | 8.3  |       |       |        |        | 95  | 7.7  |       |        |       |      |
| Ph.D.                                                                                                                           | 123  | 4.4  |       |       |        |        | 55  | 4.5  |       |        |       |      |
| Race (self-declared)                                                                                                            |      |      |       |       |        |        |     |      |       |        |       |      |
| African descendent                                                                                                              | 225  | 8.1  |       |       |        |        | 125 | 10.2 |       |        |       |      |
| Asian descendent                                                                                                                | 31   | 1.1  |       |       |        |        | 19  | 1.5  |       |        |       |      |
| Brown                                                                                                                           | 808  | 29.0 |       |       |        |        | 359 | 29.3 |       |        |       |      |
| Caucasian                                                                                                                       | 1723 | 61.7 |       |       |        |        | 721 | 58.8 |       |        |       |      |
| Indigenous                                                                                                                      | 4    | 0.1  |       |       |        |        | 2   | 0.2  |       |        |       |      |
| Income                                                                                                                          |      |      |       |       |        |        |     |      |       |        |       |      |
| No income                                                                                                                       | 112  | 4.0  |       |       |        |        | 43  | 3.5  |       |        |       |      |
| Up to 2 minimum salaries                                                                                                        | 653  | 23.4 |       |       |        |        | 257 | 21.0 |       |        |       |      |
| From 02 up to 04 salaries                                                                                                       | 820  | 29.4 |       |       |        |        | 326 | 26.6 |       |        |       |      |
| From 04 up to 10 salaries                                                                                                       | 819  | 29.3 |       |       |        |        | 334 | 27.2 |       |        |       |      |
| From 10 up to 20 salaries                                                                                                       | 308  | 11.0 |       |       |        |        | 195 | 15.9 |       |        |       |      |
| Above 20 salaries                                                                                                               | 23   | 0.8  |       |       |        |        | 34  | 2.8  |       |        |       |      |
| Non-respondents                                                                                                                 | 56   | 2.0  |       |       |        |        | 37  | 3.0  |       |        |       |      |
| Marital status                                                                                                                  |      |      |       |       |        |        |     |      |       |        |       |      |
| Single                                                                                                                          | 1760 | 63.1 |       |       |        |        | 772 | 63.0 |       |        |       |      |
| Married/Civil partnership                                                                                                       | 850  | 30.5 |       |       |        |        | 408 | 33.3 |       |        |       |      |
| Non-respondents                                                                                                                 | 181  | 6.5  |       |       |        |        | 46  | 3.8  |       |        |       |      |
| Brazilian region                                                                                                                |      |      |       |       |        |        |     |      |       |        |       |      |
| North                                                                                                                           | 19   | 2.3  |       |       |        |        | 10  | 0.3  |       |        |       |      |
| Northeast                                                                                                                       | 77   | 9.5  |       |       |        |        | 36  | 0.3  |       |        |       |      |
| Center-west                                                                                                                     | 34   | 4.2  |       |       |        |        | 19  | 0.4  |       |        |       |      |
| Southeast                                                                                                                       | 628  | 78.1 |       |       |        |        | 280 | 5.7  |       |        |       |      |
| South                                                                                                                           | 46   | 5.7  |       |       |        |        | 40  | 1.1  |       |        |       |      |
| Non-respondents                                                                                                                 | 1987 | 71.2 |       |       |        |        | 841 | 68.6 |       |        |       |      |
| DASS-21 items                                                                                                                   |      |      |       |       |        |        |     |      |       |        |       |      |
| 01 - I found it hard to wind down                                                                                               |      |      | 1.48  | 0.926 | 0.110  | -0.840 |     |      | 1.22  | 0.942  | 0.398 | -0.3 |
| 02 - I was aware of dryness of my mouth                                                                                         |      |      | 0.95  | 1.058 | 0.714  | -0.822 |     |      | 0.71  | 0.969  | 1.109 | -0.3 |
| 03 - I couldn't seem to experience any positive feeling at all                                                                  |      |      | 0.74  | 0.881 | 0.919  | -0.147 |     |      | 0.66  | 0.864  | 1.117 | 0.3  |
| 04 - I experienced breathing difficulty (e.g., excessively rapid breathing, breathlessness in the absence of physical exertion) |      |      | 0.87  | 1.028 | 0.830  | -0.606 |     |      | 0.56  | 0.889  | 1.467 | 1.0  |
| 05 - I found it difficult to work up the initiative to do things                                                                |      |      | 1.74  | 1.042 | -0.219 | -1.172 |     |      | 1.44  | 1.059  | 0.099 | -1.0 |
| 06 - I tended to over-react to situations                                                                                       |      |      | 1.44  | 1.028 | 0.117  | -1.123 |     |      | 1.11  | 1.011  | 0.488 | -0.3 |
| 07 - I experienced trembling (e.g., in the hands)                                                                               |      |      | 0.64  | 0.963 | 1.298  | 0.411  |     |      | 0.43  | 0.837  | 1.892 | 2.3  |
| 08 - I felt that I was using a lot of nervous energy                                                                            |      |      | 1.38  | 1.017 | 0.194  | -1.066 |     |      | 1.05  | 0.992  | 0.558 | -0.3 |
| 09 - I was worried about situations in                                                                                          |      |      | 1.07  | 1.101 | 0.544  | -1.093 |     |      | 0.74  | 0.997  | 1.089 | -0.3 |



which I might panic and make a fool of myself

|                                                                                                                                            |       |        |        |        |       |        |       |     |
|--------------------------------------------------------------------------------------------------------------------------------------------|-------|--------|--------|--------|-------|--------|-------|-----|
| 10 - I felt that I had nothing to look forward to                                                                                          | 0.99  | 1.063  | 0.663  | -0.875 | 0.86  | 1.005  | 0.833 | -0. |
| 11 - I found myself getting agitated                                                                                                       | 1.61  | 1.004  | -0.087 | -1.078 | 1.35  | 1.031  | 0.194 | -1. |
| 12 - I found it difficult to relax                                                                                                         | 1.81  | 0.993  | -0.286 | -1.035 | 1.47  | 1.024  | 0.079 | -1. |
| 13 - I felt down-hearted and blue                                                                                                          | 1.59  | 1.060  | -0.031 | -1.237 | 1.22  | 1.062  | 0.362 | -1. |
| 14 - I was intolerant of anything that kept me from getting on with what I was doing                                                       | 1.32  | 1.016  | 0.251  | -1.041 | 1.13  | 1.012  | 0.457 | -0. |
| 15 - I felt I was close to panic                                                                                                           | 0.98  | 1.054  | 0.696  | -0.801 | 0.64  | 0.938  | 1.284 | 0.  |
| 16 - I was unable to become enthusiastic about anything                                                                                    | 1.20  | 1.061  | 0.385  | -1.094 | 0.97  | 1.017  | 0.686 | -0. |
| 17 - I felt I wasn't worth much as a person                                                                                                | 1.07  | 1.146  | 0.580  | -1.153 | 0.85  | 1.068  | 0.920 | -0. |
| 18 - I felt that I was rather touchy                                                                                                       | 1.84  | 0.993  | -0.322 | -1.024 | 1.27  | 1.059  | 0.341 | -1. |
| 19 - I was aware of the beating of my heart in the absence of physical exertion (e.g., sense of heart rate increase, heart missing a beat) | 0.98  | 1.067  | 0.681  | -0.868 | 0.72  | 0.976  | 1.161 | 0.  |
| 20 - I felt scared without any good reason                                                                                                 | 1.13  | 1.086  | 0.481  | -1.095 | 0.71  | 0.977  | 1.178 | 0.  |
| 21 - I felt that life was meaningless                                                                                                      | 0.92  | 1.115  | 0.808  | -0.820 | 0.77  | 1.041  | 1.062 | -0. |
| Total                                                                                                                                      | 25.78 | 15.335 | 0.364  | -0.793 | 19.88 | 14.526 | 0.697 | -0. |

152 *Note.* This table presents descriptive analyses of the sociodemographic and DASS-21 items divided by  
 153 gender, <sup>a</sup> N = 2791 (69,48%), <sup>b</sup> N = 1226 (30,52%), n = sample, % = percentage, M = mean, SD = standard  
 154 deviation, sk = skewness, kt = kurtosis, \*p < .001, d = Cohen's d effect size estimator (small = 0.2; medium  
 155 = 0.5; large = 0.8, and very large = 1.3, [67].  
 156

### 157 **2.3. Measures**

158 A sociodemographic questionnaire was developed for the purpose of obtaining data on  
 159 age, gender (female, male, intersex), marital status (single, married, divorced, etc.), self-  
 160 reported race (African descendant, Asian descendant, brown, indigenous and white),  
 161 school background (elementary school, high school, college, etc.), family income,  
 162 occupation (college student, professional) and region of residence (North, Northeast,  
 163 Center-West, Southeast, South).

164 DASS-21 [3,68] was adapted to the Brazilian population by Vignola and Tucci  
 165 [69]. It is composed of 21 items, with seven items for each subscale: depression ( $\alpha =$   
 166 .92), anxiety ( $\alpha = .86$ ) and stress ( $\alpha = .90$ ). The items are rated on a four-point Likert  
 167 scale ranging from 0 (“did not apply at all”) to 3 (“applied a lot or most of the time”).  
 168

### 169 **2.4. Procedures**

170 This investigation was carried out exclusively by web-based data collection (due to the  
171 COVID-19 pandemic) from April to August 2020.

172 The research team prepared an invitation letter explaining the purpose of the  
173 study, with a link providing access to the online form comprising the consent form, the  
174 sociodemographic questionnaire and DASS-21. It was forwarded by email to  
175 universities, companies/managers, hospitals and health/psychosocial care centers in  
176 different regions of the country and was also published on Facebook and Instagram  
177 accounts. Participants could also forward the form to other potential contributors.

178 This study was approved by an ethics and research committee involving human  
179 subjects under CAAE registration code 07077019.3.0000.5149, according to National  
180 Health Council (CNS) resolution numbers 466/2012 and 510/2016.

181

## 182 **2.5. Statistical and data analysis**

### 183 *2.5.1. Descriptive analysis*

184 Descriptive analyses were used to describe the characteristics of the sample [70].  
185 Skewness, kurtosis, mean difference and effect size tests were applied to continuous  
186 variables, with gender as a comparison factor. When pertinent to the analyses, a p value  
187 of  $< .05$  was adopted.

188

### 189 *2.5.2. EGA*

190 EGA is a recently developed method to estimate the number of dimensions in  
191 multivariate data using undirected network models [59,60]. EGA first applies a network  
192 estimation method followed by a community detection algorithm for weighted networks  
193 [71].

194

195 *2.5.2.1. Network estimation method*

196 This study applied the graphical Least Absolute Shrinkage and Selection Operator  
197 (GLASSO [72,73], which estimates a Gaussian graphical model (GGM [74]) where  
198 nodes (circles) represent variables and edges (lines) represent the conditional  
199 dependence (or partial correlations) between nodes, given all other nodes in the  
200 network.

201 LASSO uses a parameter called lambda ( $\lambda$ ), which controls the sparsity of the  
202 network. Lower values of  $\lambda$  remove fewer edges, increasing the possibility of including  
203 spurious correlations, whereas larger values of  $\lambda$  remove more edges, increasing the  
204 possibility of removing relevant edges. When  $\lambda = 0$ , the estimates are equal to the  
205 ordinary least-squares solution for the partial correlation matrix. In this study, the ratio  
206 of the minimum and maximum  $\lambda$  was set to .1 (.5 is the higher value).

207 The popular approach in the network psychometrics literature is to compute  
208 models across several values of  $\lambda$  (usually 100) and to select the model that minimizes  
209 the extended Bayesian information criterion (EBIC [75,76]). The EBIC model selection  
210 uses a hyperparameter gamma ( $\gamma$ ) to control how much it prefers simpler models (i.e.,  
211 models with fewer edges [77]). Larger  $\gamma$  values lead to simpler models, whereas smaller  
212  $\gamma$  values lead to denser models. When  $\gamma = 0$ , the EBIC is equal to the Bayesian  
213 information criterion. In this study,  $\gamma$  was set to 0. In the network psychometrics  
214 literature, this approach has been termed EBICglasso and is applied using the qgraph  
215 package.

216

217 *2.5.2.2. Community detection algorithm*

218 The Walktrap algorithm [78] is a commonly applied community detection algorithm in  
219 the network psychometrics literature [59,60]. The algorithm begins by computing a

220 transition matrix where each element represents the probability of one node traversing  
221 to another (based on node strength or the sum of the connections to each node). Random  
222 walks are then initiated for a certain number of steps (e.g., 4) using the transition matrix  
223 for probable destinations. Using Ward's agglomerative clustering approach [79], each  
224 node starts as its own cluster and merges with adjacent clusters (based on squared  
225 distances between each cluster) in a way that minimizes the sum of squared distances  
226 between other clusters. Modularity [80] is then used to determine the optimal partition  
227 of clusters (i.e., communities). The Walktrap algorithm was implemented using the  
228 igraph package in R [81].

229

### 230 *2.5.3. CFA and internal consistency*

231 CFA using the unweighted least-squares estimator was conducted to test the internal  
232 structure of DASS-21 in seven different models, including the model originated by  
233 EGA. An adequate fit was considered when comparative fit index (CFI) and Tucker-  
234 Lewis index (TLI) values were  $> .90$ ; values of  $> .95$  indicated a good fit [82]. Root-  
235 mean -square error of approximation (RMSEA) values of  $.08$  and  $.06$  indicated an  
236 acceptable fit, with values  $< .05$  indicating a good fit [82]. Factor loadings were  
237 considered adequate if they were  $\geq .40$ . Internal consistency was calculated from  
238 composite reliability [83]. Indices with values of  $\geq .80$  were considered adequate [84].

239

### 240 *2.5.4. Factor invariance*

241 Factor invariance of CFA for gender and occupation was tested on a DASS-21 four-  
242 factor model: configural invariance (equality for fit); weak or metric invariance  
243 (equality for factor loadings); strong invariance (equality for item interceptions); and  
244 strict invariance (equality for residual variances or uniqueness) [46]. The fit of the

245 configural model data was measured using CFI, TLI and RMSEA. The configural  
246 model would be rejected if it displayed  $CFI < .90$  or  $RMSEA \geq .08$ . The weak, strong  
247 and strict invariance models would be rejected if they displayed  $\Delta CFI > .005$  and  $\Delta TLI$   
248  $> .005$ .

249 The database for this research can be downloaded and cited from the following  
250 link <https://osf.io/xpabk/>.

### 251 **3. Results**

#### 252 **3.1. EGA and BootEGA**

253 Figure 1a provides the estimated dimensionality of DASS-21 obtained using EGA. Four  
254 dimensions were estimated, with items distributed as follows: 01, 06, 08, 11, 12, 14 and  
255 18 for the stress dimension and 03, 05, 10, 13, 16, 17 and 21 for the depression  
256 dimension; the anxiety dimension was divided into two, one with items 02, 04, 07 and  
257 09 and the other with items 09, 15 and 20. Figure 1b provides the median  
258 dimensionality structure of the network (i.e., the network calculated as the median of  
259 the estimated partial regularized correlations between bootstrap networks).

260 **Figure 1. Dimensionality structure of DASS-21 from EGA (a) and BootEGA (b).**  
261 *Note.* Representation of the dimensional structure of the new DASS-21 model from  
262 EGA (a) and BootEGA; The lines in both figures and their thickness express the  
263 relationship between items. Items that have the same color are represented as belonging  
264 to the same dimension; red (1) = stress items, blue (2) = depression items, green (3) =  
265 anxiety items, and orange (4) = panic items. BootEGA supported the 4-factor model by  
266 72.6%.

267  
268 The original EGA structure with four dimensions was found in most of the  
269 dimensional solutions estimated via BootEGA. In addition to the four-factor  
270 dimensional structure in 72.6% of the interactions, a three-dimensional structure was  
271 observed in 26.5% and a five-dimensional structure in 9% of interactions. Item  
272 replication analyses indicated good replicability across all items in the four-dimensional  
273 model ( $> .65$ ) (Figure 2).

274 **Figure 2. Replication of the DASS-21 items for each of the original EGA**  
 275 **dimensions.** *Note.* Replication of EGA DASS-21 Model for four dimensions. Best fits  
 276 of replication are > .65.  
 277

278 **3.2. CFA and internal consistency**

279 The factor loadings of the DASS-21 items revealed appropriate factor loadings for all  
 280 seven models tested (see Table 2).

281 **Table 2. Factor Loading and Coefficient Determination of DASS Tested Models**

| Factors                | Single Factor Models                      |                |                                 |                | Two factor models                                                                           |                |                                          |                |                                                                                                                    |                |
|------------------------|-------------------------------------------|----------------|---------------------------------|----------------|---------------------------------------------------------------------------------------------|----------------|------------------------------------------|----------------|--------------------------------------------------------------------------------------------------------------------|----------------|
|                        | Ruiz et al. [23];<br>Kyriazos et al. [42] |                | Gonzales-Riviera et<br>al. [37] |                | Lovibond [85];<br>Schoever et al. [86];<br>Schoevers et al.<br>[87]; Gloster et al.<br>[38] |                | Gloster et al. [38];<br>Ruiz et al. [23] |                | Lovibond &<br>Lovibond [3]; Page<br>et al. [40]; Shea et<br>al. [88]; Alfnsson et<br>al. [39]; Ruiz et al.<br>[23] |                |
|                        | M1                                        |                | M2                              |                | M3                                                                                          |                | M4                                       |                | M5                                                                                                                 |                |
|                        | Factor<br>loading                         | R <sup>2</sup> | Factor<br>loading               | R <sup>2</sup> | Factor<br>loading                                                                           | R <sup>2</sup> | Factor<br>loading                        | R <sup>2</sup> | Factor<br>loading                                                                                                  | R <sup>2</sup> |
| Stress                 |                                           |                |                                 |                |                                                                                             |                |                                          |                |                                                                                                                    |                |
| 01                     | 0.62*                                     | 0.44           |                                 |                | 0.69*                                                                                       | 0.48           | 0.67*                                    | 0.45           | 0.68*                                                                                                              | 0.46           |
| 06                     | 0.72*                                     | 0.48           |                                 |                | 0.73*                                                                                       | 0.53           | 0.70*                                    | 0.49           | 0.71*                                                                                                              | 0.50           |
| 08                     | 0.80*                                     | 0.62           |                                 |                | 0.82*                                                                                       | 0.69           | 0.79*                                    | 0.63           | 0.80*                                                                                                              | 0.65           |
| 11                     | 0.67*                                     | 0.43           |                                 |                | 0.69*                                                                                       | 0.48           | 0.66*                                    | 0.44           | 0.67*                                                                                                              | 0.46           |
| 12                     | 0.76*                                     | 0.56           |                                 |                | 0.79*                                                                                       | 0.62           | 0.76*                                    | 0.57           | 0.76*                                                                                                              | 0.58           |
| 14                     | 0.68*                                     | 0.44           |                                 |                | 0.69*                                                                                       | 0.48           | 0.67*                                    | 0.45           | 0.67*                                                                                                              | 0.45           |
| 18                     | 0.76*                                     | 0.52           |                                 |                | 0.76*                                                                                       | 0.57           | 0.73*                                    | 0.54           | 0.73*                                                                                                              | 0.54           |
| Depression             |                                           |                |                                 |                |                                                                                             |                |                                          |                |                                                                                                                    |                |
| 03                     | 0.50*                                     | 0.31           | 0.59*                           | 0.31           | 0.57*                                                                                       | 0.32           | 0.57*                                    | 0.32           | 0.61*                                                                                                              | 0.37           |
| 05                     | 0.66*                                     | 0.39           | 0.68*                           | 0.36           | 0.63*                                                                                       | 0.39           | 0.63*                                    | 0.40           | 0.67*                                                                                                              | 0.45           |
| 10                     | 0.72*                                     | 0.47           |                                 |                | 0.70*                                                                                       | 0.49           | 0.70*                                    | 0.49           | 0.75*                                                                                                              | 0.56           |
| 13                     | 0.87*                                     | 0.65           | 0.87*                           | 0.63           | 0.82*                                                                                       | 0.67           | 0.82*                                    | 0.67           | 0.87*                                                                                                              | 0.77           |
| 16                     | 0.80*                                     | 0.58           | 0.85*                           | 0.57           | 0.77*                                                                                       | 0.59           | 0.77*                                    | 0.59           | 0.82*                                                                                                              | 0.68           |
| 17                     | 0.81*                                     | 0.51           |                                 |                | 0.73*                                                                                       | 0.53           | 0.72*                                    | 0.53           | 0.78*                                                                                                              | 0.61           |
| 21                     | 0.75*                                     | 0.47           |                                 |                | 0.70*                                                                                       | 0.49           | 0.69*                                    | 0.48           | 0.74*                                                                                                              | 0.56           |
| Anxiety                |                                           |                |                                 |                |                                                                                             |                |                                          |                |                                                                                                                    |                |
| 02                     | 0.58*                                     | 0.31           |                                 |                | 0.57*                                                                                       | 0.32           | 0.60*                                    | 0.37           | 0.57*                                                                                                              | 0.33           |
| 04                     | 0.58*                                     | 0.33           | 0.69*                           | 0.39           | 0.58*                                                                                       | 0.34           | 0.63*                                    | 0.39           | 0.59*                                                                                                              | 0.35           |
| 07                     | 0.55*                                     | 0.35           | 0.66*                           | 0.38           | 0.60*                                                                                       | 0.36           | 0.64*                                    | 0.42           | 0.60*                                                                                                              | 0.37           |
| 19                     | 0.70*                                     | 0.44           | 0.77*                           | 0.48           | 0.67*                                                                                       | 0.46           | 0.72*                                    | 0.52           | 0.68*                                                                                                              | 0.46           |
| Anxiety/<br>new factor |                                           |                |                                 |                |                                                                                             |                |                                          |                |                                                                                                                    |                |
| 09                     | 0.79*                                     | 0.53           | 0.78*                           | 0.54           | 0.74*                                                                                       | 0.55           | 0.79*                                    | 0.62           | 0.74*                                                                                                              | 0.56           |
| 15                     | 0.81*                                     | 0.61           | 0.85*                           | 0.66           | 0.79*                                                                                       | 0.63           | 0.85*                                    | 0.72           | 0.80*                                                                                                              | 0.64           |
| 20                     | 0.78*                                     | 0.53           | 0.77*                           | 0.55           | 0.74*                                                                                       | 0.54           | 0.79*                                    | 0.62           | 0.74*                                                                                                              | 0.55           |

282 *Note.* Confirmatory factor analysis comparing the current model generated by EGA with replications of  
 283 others previously tested in the literature; satisfactory factor loadings  $\geq .40$ ; R<sup>2</sup> = coefficient determination;  
 284 \* p < .001; M1 = Model 1: which features clustering of all 21 items from the depression, anxiety, and stress  
 285 subscales; M2 = Model 2: clusters items 03, 05, 13, and 16 from the depression subscale, and items 04, 07,  
 286 09, 15, 19, and 20 from anxiety subscale; M3 = Model 3: encompassing items from depression and anxiety

287 subscales as a factor differing from stress factor; M4 = Model 4: comprises the arrangement of the items  
 288 from depression and stress subscales as a factor differing from anxiety factor; M5 = Model 5: encompassing  
 289 items from anxiety and stress subscales as a factor differing from depression factor; M6 = Model 6: three  
 290 factor model; items from depression, anxiety and stress subscales form specific factors, each one of them,  
 291 setting a tridimensional model. M7 = Model 7: composed by four different factors consisting of depression  
 292 and stress subscales, and the split between items 02, 04, 07, and 19, and 09, 15, and 20 from anxiety  
 293 subscale.  
 294

295 All models showed very good fit indices (CFI and TLI > .95 and RMSEA ≤ .08)  
 296 but Model 7 was the best of all because it also showed a non-significant chi-square  
 297 value (see Table 3).  
 298

299 **Table 3. Fit Indexes of Replicated and New DASS-21 Models**

| Model | $\chi^2$  | df  | CFI  | TLI  | RMSEA | 90% CI<br>RMSEA | SRMR  |
|-------|-----------|-----|------|------|-------|-----------------|-------|
| M1    | 2954.93*  | 189 | 0.99 | 0.98 | 0.060 | 0.040-0.070     | 0.060 |
| M2    | 1186.33*  | 35  | 0.98 | 0.97 | 0.080 | 0.080-0.090     | 0.070 |
| M3    | 2451.094* | 188 | 0.98 | 0.98 | 0.055 | 0.053-0.057     | 0.074 |
| M4    | 2221.741* | 188 | 0.98 | 0.98 | 0.052 | 0.050-0.054     | 0.050 |
| M5    | 1564.710* | 188 | 0.99 | 0.99 | 0.043 | 0.041-0.045     | 0.043 |
| M6    | 1060.12*  | 186 | 1.00 | 0.99 | 0.030 | 0.030-0.040     | 0.030 |
| M7    | 899.09    | 183 | 1.00 | 1.00 | 0.030 | 0.029-0.033     | 0.030 |

300 *Note.* Confirmatory fit indices for each of the tested DASS-21 models, including the one with a new fourth  
 301 dimension; the name of the models, factors, subscales and comprising items were described in table 2;  $\chi^2$  =  
 302 chi-square; \* p < .01; df = degrees of freedom; CFI = Comparative Fit Index; TLI = Tucker Lewis Index;  
 303 RMSEA = Root-Mean-Square Error of Approximation; CI RMSEA = Confidence Interval of Root-Mean-  
 304 Square Error of Approximation; SRMR = Standardized Root Mean Square Residual.  
 305

306 The composite reliability values were .901 for depression, .894 for anxiety, .890  
 307 for stress and .842 for the new dimension.  
 308

### 309 **3.3. Factor invariance**

310 The overall fit indices were adequate for the configural model and there was invariance  
 311 in all the procedures applied. These results support measurement invariance for the  
 312 four-factor model and indicate the same underlying constructs observed for both men  
 313 and women as for the type of activity performed by participants (see Table 4).

314 **Table 4. Factorial Invariance for DASS-21 New Model Applied for Gender and**  
 315 **Type of Activity Performed by Participants**

| Model                      | Model fit |     |      |      |       |              | Model differ |
|----------------------------|-----------|-----|------|------|-------|--------------|--------------|
|                            | $\chi^2$  | df  | CFI  | TLI  | RMSEA | 90% CI RMSEA |              |
| Gender                     |           |     |      |      |       |              |              |
| M1: Configural             | 922.999   | 326 | 1.00 | 1.00 | .030  | .028-.032    | -            |
| M2: Weak                   | 1070.289* | 343 | .996 | .995 | .032  | .030-.035    | .004         |
| M3: Strong                 | 1174.618* | 359 | .995 | .995 | .034  | .032-.036    | .001         |
| M4: Strict                 | 1307.507* | 421 | .995 | .995 | .032  | .030-.034    | .000         |
| Type of activity performed |           |     |      |      |       |              |              |
| M1: Configural             | 162.072   | 108 | 1.00 | 1.00 | .030  | .030-.034    | -            |
| M2: Weak                   | 181.888*  | 129 | .999 | .999 | .033  | .031-.034    | .001         |
| M3: Strong                 | 186.007*  | 139 | .996 | .995 | .032  | .032-.034    | .003         |
| M4: Strict                 | 207.536*  | 152 | .998 | .998 | .038  | .024-.051    | .002         |

316 *Note.* Factorial invariance considering gender and type of activity performed by participants;  $\chi^2$  = chi-  
 317 square; \*p < .001; df = degrees of freedom; CFI = Comparative Fit Index; TLI = Tucker Lewis Index;  
 318 RMSEA = Root-Mean-Square Error of Approximation; CI RMSEA = Confidence Interval of Root-Mean-  
 319 Square Error of Approximation;  $\Delta$ CFI = Difference between Comparative Fit Indices;  $\Delta$ TLI = the  
 320 difference between Tucker Lewis Indices.  
 321

## 322 4. Discussion

323 The principal purpose of this study was to examine the psychometric properties of  
 324 DASS-21 from a network psychometrics perspective. The results revealed four  
 325 dimensions in the scale, instead of three. CFA demonstrated that this model presents  
 326 excellent fit indices – individual and overall – even better than those replicated from  
 327 others previously tested in the literature. The composite reliability indices showed  
 328 excellent values. The dimensions of the new model were invariant between sex and type  
 329 of activity performed by participants. Thus, the applicability of the dimensional scores  
 330 of the scale was demonstrated.

331

### 332 4.1. Sample characteristics and new approach for psychometric properties of DASS-

333 21



334 It is common for studies to point out significant differences in gender between the  
335 subscales of DASS-21 [20, 91], showing a higher prevalence of negative affective  
336 experiences for women compared to men [92]. This research reported significant  
337 difference between females and males' participants for each item of the scale and the  
338 total score, with small to medium effect sizes, which corroborates data already  
339 established by the literature.

340 Research regarding the psychometric properties of DASS-21 has mostly used  
341 EFA and CFA as the main tools to check the association between the scale items. We  
342 expect to see a greater amount of these types of studies due to the extensive use and  
343 adaptation of DASS-21 for different cultural contexts [2, 23, 37]. However, DASS-21  
344 showed unsatisfactory confirmatory fit indices, even with a three-dimensional model  
345 being the most promising, as in the studies by Brown et al. [1], Clara et al. [90], and  
346 Daza et al. [66]. Other research also reported problems regarding the factor  
347 configuration of the DASS-21, since confirmatory models displayed appropriate fits on  
348 deleting one or more items or on associating residual variances between them [see 5, 8,  
349 17, 37, 39, 48, 51, 93].

350 Unsatisfactory fit indices for DASS-21 dimensions persevered even when using  
351 ESEM and BESEM. It happens due to latent variables being measured through  
352 exploratory factor analysis, and in that sense, the explanation about a relationship  
353 between latent variables becomes more difficult due to multiple item cross-loadings  
354 [94]. Johnson et al. [16] observed that items related to anxiety factor loaded into the two  
355 other factors of the scale. Kyriazos et al. [42] showed there were excellent fits for a  
356 trifactor model for a shortened version of the scale. However, the relationship between

357 the dimensions was very strong, above .870 in all cases. Gomez et al. [2] verified that  
358 some items from both the anxiety and the stress subscales were poorly defined in terms  
359 of their target dimensions. Further studies on DASS-21 based on Item Response Theory  
360 (IRT) have also reported problems of item fitting [38, 95,96]. Thus, considering  
361 previous outcomes in the literature and the complex nature of the groups and scenarios  
362 that have been observed, then, we decided to employ EGA and BootEGA. In addition, a  
363 recent review of the literature has not yet reported studies in which such methodology  
364 has been applied to DASS-21.

365 Network analysis presented in this paper allows observing the strength of  
366 association among the items in which it is possible to verify the formation of clusters  
367 [59] and therefore does not aim to recognize a common latent trait [58]. Furthermore,  
368 using EGA as a technique to process the data, it was possible to identify four factors  
369 instead of three. The depression and stress factors were kept, while the anxiety subscale  
370 was divided into items 02 (I was aware of dryness of my mouth), 04 (I experienced  
371 breathing difficulty), 07 (I experienced trembling), and 19 (I was aware of the beating  
372 of my heart in the absence of physical exertion) in one factor, and items 09 (I was  
373 worried about situations in which I might panic and make a fool of myself), 15 (I felt I  
374 was close to panic), and 20 (I felt scared without any good reason) in another. Items  
375 from anxiety subscale have previously presented problems regarding their theoretical  
376 dimension [37], as they have been distributed among others [2,41 97]. However, this  
377 configuration among the anxiety subscale items had not yet been reported. In addition to  
378 the one new dimension, the values of empirical EGA communities were greater than .65  
379 across items and their respective dimensions (see Figure 2). BootEGA checked the

380 consistency of the four-dimensional model derived for DASS-21. In addition, it was  
381 possible to establish the topological similarity between EGA and BootEGA from visual  
382 analysis (see Figure 1a and b).

383 CFA applied to this new model revealed better individual and overall fit indices,  
384 including a non-significant chi-square, compared to the others tested in this research.  
385 No associations were made among the measurement errors of the items and residuals to  
386 enhance the tested models. This was justified because all the models presented  
387 satisfactory fit indices and to avoid interfere with the parsimony approach in the  
388 interpretation of the results [45]. Most research used Cronbach's alpha to estimate  
389 dimensional and global internal consistency of DASS-21, with a few exceptions [16, 38,  
390 42]. We chose to use composite reliability after the new model was defined, since it  
391 considers measurement errors, providing a more robust index to comprise the portion of  
392 estimating each item to its dimension [84], whereas alpha is calculated under the  
393 assumption that each item equally affects the variance of a factor [98,99]. The four  
394 factors showed excellent internal consistency.

395 Previous studies have reported evidence for factor invariance for DASS-21  
396 three-dimensional model [24, 47-49]. The outcomes of this investigation pointed out  
397 there is factor invariance for DASS-21 four-dimensional model regarding gender and  
398 type of activity performed by participants which enables the scale for comparative  
399 statistics proposes. Future studies focusing on this approach can test the invariance of  
400 this new model considering other groups.

401 Both traditional and network psychometrics analyses have evidenced a new  
402 version for DASS-21 with four distinct dimensions. However, we have another two

403 tasks: define how the new arrangement it should be displayed and examine which  
404 further evidence is available to support the reallocation among the anxiety items scale  
405 into two new dimensions.

406

#### 407 ***4.2. Other support for a new dimension of DASS-21***

408 The model with three distinct DASS-21 dimensions is the most reported, although the  
409 results of this research demonstrated a split among items belonging to the anxiety  
410 subscale. Items 02, 04, 07 and 19 remained labeled as anxiety but what would be the  
411 most appropriate name for the dimension comprised of items 09, 15 and 20? DASS-21  
412 was developed based on the recognition of symptoms related to affective and anxiety  
413 disturbances and works as a clinical screening method, although with no diagnostic  
414 intent [68, 100-102]. The new dimension was hereby nominated as "Panic" due to its  
415 items being related to panic disorder (PD), as a counterpart to generalized anxiety  
416 disorder (GAD) referring to the remaining items.

417         Studies have exhibited similarities between the etiology of PD and GAD  
418 [103,104] but they differ in other aspects. Such a distinction was first drawn in the 3rd  
419 edition of the *Diagnostic and Statistical Manual of Mental Disorders* ([DSM-III], APA,  
420 [105]) based on the responses assigned to pharmacological treatments for each group  
421 [106]. Rapee [107] had identified hyperventilation and subtle onset of PD at an older  
422 age than people presenting with GAD. Panic is characterized by a set of sympathetic  
423 autonomic responses that culminate in anticipatory seizures, subjective discomfort and  
424 fear of losing control and/or dying [108-114], whereas GAD can be defined as a clinical  
425 condition held from distortions concerning ambiguous situations that are characterized

426 by uncertain consequences [115]. These two clinical conditions exhibit distinct  
427 comorbidities. Ibiloglu and Caykoylu [116] demonstrated that PD has greater  
428 comorbidity with bipolar disorder, whereas [80] and Wittchen et al. [117] reported  
429 greater comorbidity for GAD with depression, dysthymia, post-traumatic stress and  
430 social phobia. There are, however, other ways to distinguish PD and GAD besides  
431 phenomenological observations [113], such as neurophysiological, cognitive and  
432 psychological treatment plans.

433         People with PD are more sensitive to bodily sensations and prone to increased  
434 basal arousal throughout the day than those with GAD or non-anxious people [118]. A  
435 higher heart rate previously has been reported for PD when compared to GAD [119].  
436 Analyses using machine learning have demonstrated that heart rate variability (HRV)  
437 measurement can differentiate PD from other anxiety disorders [113] and that people  
438 with PD are more prone to heart disease and death [120]. People with PD showed  
439 higher levels of interleukin 6 (IL-6) compared to GAD and therefore show better  
440 treatment response to escitalopram [121]. There is no clear distinction between  
441 prefrontal cortex function for emotion regulation in PD and GAD [122] but there is a  
442 distinction for several areas related to the emotional processing, social, planning and  
443 threat responses [123]. Thus, information processing may be impaired in both PD and  
444 GAD and simultaneously differentiates them in terms of cognitive function. Young  
445 adults with PD performed lower on verbal fluency compared to those with GAD, for  
446 which performance on memory tasks was shown to be impaired [124].

447         Interventions based on cognitive therapy have been reported to be effective in  
448 reducing both panic and anxiety symptoms [125] but varying in the treatment approach

449 [126]. One approach would be psychoeducation, a method in which the problems and  
450 their idiosyncrasies are explained [127,128]. Psychosocial interventions for panic  
451 symptoms are reliant on exposure, reassessment of physical symptoms and relaxation  
452 but are grounded in behavioral changes, re-evaluation of anxiety-inducing situations and  
453 cognitive restructuring for anxiety symptoms [127, 129]. This arises due to physical  
454 responses being misinterpreted and leading to a panic attack for those with PD [130]  
455 and by identifying and reinterpreting specific triggers linked to warning in ambiguous  
456 situations for those with GAD [131]. Applied relaxation reduces seizures and feelings of  
457 loss of control in panic [132] and levels of worry, physical responses and negative  
458 thoughts in anxiety [133]. Furthermore, follow-up studies revealed that people with  
459 GAD maintained their improved status for at least 12 months after treatment  
460 completion, whereas those with PD did not [134].

461 All the evidence above shows that there is differentiation between panic and  
462 anxiety. This research presented the formation of a new cluster from some items on the  
463 anxiety subscale. Analysis of the psychometric properties of DASS-21 revealed a  
464 distinction between characteristics that were once attributed only to anxiety but are  
465 better applied to panic, as described in the literature on PD and GAD. Thus, the results  
466 found in this research corroborate that the experience that differentiates panic and  
467 anxiety can be identified by DASS-21. In this sense, clinical practices and research that  
468 need to differentiate between these two conditions may rely on the use of a brief  
469 screening tool.

470

## 471 **5. Strengths, limitations and implications**

472 The results of this research come from an emerging data analysis methodology [53, 58,  
473 60]. Network psychometrics constitutes a new paradigm for understanding how items  
474 related to a specific construct associate as a complex system [135,136]. Computation of  
475 composite reliability, comparison among DASS-21 models already tested in the  
476 literature with the current one and observation of factor invariance by gender and type  
477 of activity of the participants revealed that the new factor should be on the agenda of  
478 upcoming research involving DASS-21, either by verifying its psychometric properties  
479 or for correlational studies. In addition, there is other strong empirical evidence  
480 supporting the new "Panic" dimension.

481 In contrast, this study has clear limitations. It is a non-probability and  
482 convenience sample where it was not possible to control the distribution of the number  
483 of participants among the different regions of the country. Data collection was  
484 conducted virtually due to the COVID-19 pandemic and it was not possible, in  
485 accordance with social distance protocols, to carry out any part of the research in a face-  
486 to-face format.

487 In future studies, we suggest, initially, the use of classical and contemporary  
488 methods with the factor configuration found in this study for clinical samples. Finally,  
489 we propose an opportunity to revise the name of the scale. It would be pertinent to call  
490 it the Depression, Anxiety, Stress and Panic Scale (DASP-21). However, we believe  
491 that the scientific community will decide on the applicability of this name as several  
492 different versions of DASS-21 have emerged [see 4,12, 37, 42] even though none has  
493 yet described a fourth factor.

494

495 **6. Conclusion**

496 The results of this research have demonstrated the existence of four factors for DASS-  
497 21 in a non-clinical sample and this new model has shown improved fit indices. This  
498 study highlights the importance of network psychometrics as an analytical method  
499 applied to understanding how the items of a scale are arranged. Furthermore, this new  
500 factor configuration may support clinical screenings and treatment programs.

501

## 502 **Acknowledgements**

503 National Council for Scientific and Technological Development (CNPq), Brazil. We  
504 would like to thank Professor Tatiana Cury Pollo, Ph.D. (Federal University of São João  
505 del-Rei, UFSJ) for proofreading and contributions to the improvement of this  
506 manuscript.

507

## 508 **References**

- 509 1. Brown TA, Chorpita BF, Korotitsch W, Barlow DH. Psychometric properties of the  
510 Depression Anxiety Stress Scales (DASS) in clinical samples. *Behav Res Ther*  
511 1997;35(1):79–89.
- 512 2. Gomez R, Stavropoulos V, Griffiths MD. Confirmatory factor analysis and  
513 exploratory structural equation modelling of the factor structure of the Depression  
514 Anxiety and Stress Scales-21. Fernández-Alcántara M, organizador. *PLoS ONE*.  
515 2020;15(6):e0233998.
- 516 3. Lovibond SH, Lovibond PF. *Manual for the Depression Anxiety Stress Scales*. 4th  
517 ed. Psychology Foundation; 2004.
- 518 4. Ali AM, Alkhamees AA, Hori H, Kim Y, Kunugi H. The Depression Anxiety Stress  
519 Scale 21: Development and Validation of the Depression Anxiety Stress Scale 8-  
520 Item in Psychiatric Patients and the General Public for Easier Mental Health  
521 Measurement in a Post COVID-19 World. *IJERPH*. 2021;18(19):10142.
- 522 5. Henry JD, Crawford JR. The short-form version of the Depression Anxiety Stress  
523 Scales (DASS-21): Construct validity and normative data in a large non-clinical  
524 sample. *Br J Clin Psychol*. 2005;44(2):227–39.
- 525 6. Sinclair SJ, Siefert CJ, Slavin-Mulford JM, Stein MB, Renna M, Blais MA.  
526 Psychometric Evaluation and Normative Data for the Depression, Anxiety, and  
527 Stress Scales-21 (DASS-21) in a Nonclinical Sample of U.S. Adults. *Eval Health*  
528 *Prof*. 2012;35(3):259–79.



- 529 7. Mellor D, Vinet EV, Xu X, Hidayah Bt Mamat N, Richardson B, Román F. Factorial  
530 Invariance of the DASS-21 Among Adolescents in Four Countries.  
531 Eur J Psychol Assess. 2015;31(2):138–42.
- 532 8. Szabó M. The short version of the Depression Anxiety Stress Scales (DASS-21):  
533 Factor structure in a young adolescent sample. J Adolesc. 2010;33(1):1–8.
- 534 9. Gong X, Xie X-y, Xu R, Luo, Y-j. Psychometric properties of the Chinese versions  
535 of DASS-21 in Chinese college students. Chin. J. Clin. Psychol. 2010; 18(4): 443–  
536 446.
- 537 10. Patias ND, Machado WDL, Bandeira DR, Dell’Aglío DD. Depression Anxiety and  
538 Stress Scale (DASS-21) - Short Form: Adaptação e Validação para Adolescentes  
539 Brasileiros. Psico-USF. 2016;21(3):459–69.
- 540 11. Wise FM, Harris DW, Olver JH. The DASS-14: Improving the Construct Validity  
541 and Reliability of the Depression, Anxiety, and Stress Scale in a Cohort of Health  
542 Professionals. J Allied Health, 2017;46(4): e85–e90.
- 543 12. Beaufort IN, De Weert-Van Oene GH, Buwalda VAJ, de Leeuw JRJ, Goudriaan  
544 AE. The Depression, Anxiety and Stress Scale (DASS-21) as a Screener for  
545 Depression in Substance Use Disorder Inpatients: A Pilot Study. Eur Addict Res.  
546 2017;23(5):260–8.
- 547 13. Vaughan RS, Edwards EJ, MacIntyre TE. Mental Health Measurement in a Post  
548 Covid-19 World: Psychometric Properties and Invariance of the DASS-21 in  
549 Athletes and Non-athletes. Front Psychol. 2020;11:590559.
- 550 14. Martins BG, Silva WR da, Maroco J, Campos JADB. Escala de Depressão,  
551 Ansiedade e Estresse: propriedades psicométricas e prevalência das afetividades. J  
552 bras psiquiatr. 2019;68(1):32–41.
- 553 15. Lovibond PF. DASS translations; 2021.  
554 <http://www2.psy.unsw.edu.au/Groups/Dass/translations.htm>.
- 555 16. Johnson AR, Lawrence BJ, Corti EJ, Booth L, Gasson N, Thomas MG, et al.  
556 Suitability of the Depression, Anxiety, and Stress Scale in Parkinson’s Disease. JPD.  
557 2016;6(3):609–16.
- 558 17. Ali AM, Green J. Factor structure of the depression anxiety stress Scale-21 (DASS-  
559 21): Unidimensionality of the Arabic version among Egyptian drug users. Subst  
560 Abuse Treat Prev Policy. 2019;14(1):40.
- 561 18. Coker AO, Coker OO, Sanni D. Psychometric properties of the 21-item Depression  
562 Anxiety Stress Scale (DASS-21). Afr Res Rev. 2018;12(2):135.
- 563 19. Dreyer Z, Henn C, Hill C. Validation of the Depression Anxiety Stress Scale-21  
564 (DASS-21) in a non-clinical sample of South African working adults. J Psychol Afr.  
565 2019;29(4):346–53.
- 566 20. Camacho Á, Cordero ED, Perkins T. Psychometric Properties of the DASS-21  
567 Among Latina/o College Students by the US-Mexico Border. J Immigr

- 568 Minor Health. 2016;18(5):1017–23.
- 569 21. Lee D. The convergent, discriminant, and nomological validity of the Depression  
570 Anxiety Stress Scales-21 (DASS-21). *J Affect Disord.* 2019;259:136–42.
- 571 22. Mella FR, Vinet EV, Muñoz, AMA. Escalas de Depresión, Ansiedad y Estrés  
572 (DASS-21): Adaptación y propiedades psicométricas en estudiantes secundarios de  
573 Temuco. *Rev. Argentina de Clin. Psicol.* 2014;23: 179–190.
- 574 23. Ruiz FJ, Martín MBG, Falcón JCS, González PO. The hierarchical factor structure  
575 of the Spanish version of Depression Anxiety and Stress Scale – 21. *Rev Int Psicol*  
576 *Ter Psicol.* 2017;17(1): 97-105.
- 577 24. Scholten S, Velten J, Bieda A, Zhang XC, Margraf J. Testing measurement  
578 invariance of the Depression, Anxiety, and Stress Scales (DASS-21) across four  
579 countries. *Psychol Assess.* 2017;29(11):1376–90.
- 580 25. Alim M., Kibria SM, Lslam J, Uddin Z, Nessa M, Wahab A, Lslam M. Translation  
581 of DASS 21 into Bangla and validation among medical students. *Bang J Psychiatry.*  
582 2017; 28(2): 67-70. doi: 28.67.10.3329/bjpsy.v28i2.32740.
- 583 26. Apóstolo JLA, Tanner BA, Arfken CL. Confirmatory factor analysis of the  
584 portuguese Depression Anxiety Stress Scales-21. *Rev Latino-Am Enfermagem.*  
585 2012;20(3):590–6.
- 586 27. Asghari A, Saed F, Dibajnia P. (2008). Psychometric properties of the Depression  
587 Anxiety Stress Scales-21 (DASS-21) in a non-clinical Iranian sample. *Int J Psycho.*  
588 2008; 2: 82-102.
- 589 28. Bibi A, Lin M, Zhang XC, Margraf J. Psychometric properties and measurement  
590 invariance of Depression, Anxiety and Stress Scales (DASS -21) across cultures. *Int*  
591 *J Psychol.* 2020;55(6):916–25.
- 592 29. Jiang L, Yan Y, Jin Z-S, Hu M-L, Wang L, Song Y, et al. The Depression Anxiety  
593 Stress Scale-21 in Chinese Hospital Workers: Reliability, Latent Structure, and  
594 Measurement Invariance Across Genders. *Front Psychol.* 2020;11:247.
- 595 30. Musa R, Fadzil MA, Zain Z. Translation, validation and psychometric properties of  
596 Bahasa Malaysia version of the Depression Anxiety and Stress Scales (DASS).  
597 *ASEAN Journal of Psychiatry,* 2007; 8(2):82-89.
- 598 31. Pezirkianidis C, Karakasidou E, Lakioti A, Stalikas A, Galanakis M. Psychometric  
599 Properties of the Depression, Anxiety, Stress Scales-21 (DASS-21) in a Greek  
600 Sample. *PSYCH.* 2018;09(15):2933–50.
- 601 32. Nahaboo S. Validation of the French Depression Anxiety Stress Scales (DASS-21)  
602 and predictors of depression in an adolescent Mauritian population. Doctoral Thesis.  
603 Aix-Marseille University, 2015. doi: 10.13140/RG.2.1.1757.1367.
- 604 33. Rao S, Ramesh N. Depression, anxiety and stress levels in industrial workers: A  
605 pilot study in Bangalore, India. *Ind Psychiatry J.* 2015;24(1):23.

- 606 34. Sariçam H. The Psychometric Properties of Turkish Version of Depression Anxiety  
607 Stress Scale-21 (DASS-21) in Community and Clinical Samples. *JCBPR*.  
608 2018;7(1): 19–30.
- 609 35. Willemsen J, Markey S, Declercq F, Vanheule S. Negative emotionality in a large  
610 community sample of adolescents: the factor structure and measurement invariance  
611 of the short version of the depression anxiety stress scales (DASS-21). *Stress and*  
612 *Health*. 2011;27(3):e120–8.
- 613 36. Yıldırım A, Boysan M, Kefeli MC. Psychometric properties of the Turkish version  
614 of the Depression Anxiety Stress Scale-21 (DASS-21). *Br J Guid Coun*.  
615 2018;46(5):582–95.
- 616 37. González-Rivera JA, Pagán-Torres OM, Pérez-Torres EM. Depression, Anxiety and  
617 Stress Scales (DASS-21): Construct Validity Problem in Hispanics. *EJIHPE*.  
618 2020;10(1):375–89.
- 619 38. Gloster AT, Rhoades HM, Novy D, Klotsche J, Senior A, Kunik M, et al.  
620 Psychometric properties of the Depression Anxiety and Stress Scale-21 in older  
621 primary care patients. *J Affect Disord*. 2008 Oct;110(3):248-59.
- 622 39. Alfonsson S, Wallin E, Maathz P. Factor structure and validity of the Depression,  
623 Anxiety and Stress Scale-21 in Swedish translation. *J Psychiatr Ment Health Nurs*.  
624 2017;24(2–3):154–62.
- 625 40. Page AC, Hooke GR, Morrison DL. Psychometric properties of the Depression  
626 Anxiety Stress Scales (DASS) in depressed clinical samples. *Br J Clin Psychol*.  
627 2007;46(3):283–97.
- 628 41. Duffy CJ, Cunningham EG, Moore SM. Brief report: The factor structure of mood  
629 states in an early adolescent sample. *J. Adolesc*. 2005;28(5):677–80.
- 630 42. Kyriazos TA, Stalikas A, Prassa K, Yotsidi V. Can the Depression Anxiety Stress  
631 Scales Short Be Shorter? Factor Structure and Measurement Invariance of DASS-  
632 21 and DASS-9 in a Greek, Non-Clinical Sample. *PSYCH*. 2018;09(05):1095–127.
- 633 43. Asparouhov T, Muthén B. Exploratory Structural Equation Modeling. *Struct*  
634 *Equ Modeling*. 2009;16(3):397–438.
- 635 44. Marsh HW, Morin AJS, Parker PD, Kaur G. Exploratory Structural Equation  
636 Modeling: An Integration of the Best Features of Exploratory and Confirmatory  
637 Factor Analysis. *Annu Rev Clin Psychol*. 2014;10(1):85–110.
- 638 45. Byrne, B. M. *Structural equation modeling with EQS: Basic concepts, applications,*  
639 *and programming*. Routledge; 2013.
- 640 46. Putnick DL, Bornstein MH. Measurement invariance conventions and reporting:  
641 The state of the art and future directions for psychological research. *Dev. Rev*.  
642 2016;41:71–90.
- 643 47. Norton PJ. Depression Anxiety and Stress Scales (DASS-21): Psychometric  
644 analysis across four racial groups. *Anxiety Stress Coping*. 2007;20(3):253–65.

- 645 48. Oei TPS, Sawang S, Goh YW, Mukhtar F. Using the Depression Anxiety Stress  
646 Scale 21 (DASS-21) across cultures. *Int J Psychol.* 2013;48(6):1018–29.
- 647 49. Lu S, Hu S, Guan Y, Xiao J, Cai D, Gao Z, et al. Measurement Invariance of the  
648 Depression Anxiety Stress Scales-21 Across Gender in a Sample of Chinese  
649 University Students. *Front Psychol.* 2018;9:2064.
- 650 50. Gomez R, Summers M, Summers A, Wolf A, Summers JJ. Depression Anxiety  
651 Stress Scales-21: Factor Structure and Test-Retest Invariance, and Temporal  
652 Stability and Uniqueness of Latent Factors in Older Adults. *J Psychopathol Behav*  
653 *Assess.* 2014;36(2):308–17.
- 654 51. Bottesi G, Ghisi M, Altoè G, Conforti E, Melli G, Sica C. The Italian version of the  
655 Depression Anxiety Stress Scales-21: Factor structure and psychometric properties  
656 on community and clinical samples. *Compr Psychiatry.* 2015;60:170–81.
- 657 52. Zanon C, Brenner RE, Baptista MN, Vogel DL, Rubin M, Al-Darmaki FR, et al.  
658 Examining the Dimensionality, Reliability, and Invariance of the Depression,  
659 Anxiety, and Stress Scale–21 (DASS-21) Across Eight Countries. *Assessment.*  
660 2021;28(6):1531–44.
- 661 53. Caldarelli G. A perspective on complexity and networks science. *J Phys Complex.*  
662 2020;1(2):021001
- 663 54. Fried EI, Cramer AOJ. Moving Forward: Challenges and Directions for  
664 Psychopathological Network Theory and Methodology. *Perspect Psychol Sci.*  
665 2017;12(6):999–1020.
- 666 55. Senger K, Heider J, Kleinstäuber M, Sehlbrede M, Witthöft M, Schröder A.  
667 Network Analysis of Persistent Somatic Symptoms in Two Clinical Patient  
668 Samples. *Psychosom Med.* 2022;84(1):74–85.
- 669 56. Castellanos MÁ, Ausín B, Bestea S, González-Sanguino C, Muñoz M. A Network  
670 Analysis of Major Depressive Disorder Symptoms and Age- and Gender-Related  
671 Differences in People over 65 in a Madrid Community Sample (Spain). *IJERPH.*  
672 2020;17(23):8934.
- 673 57. Liu R, Chen X, Qi H, Feng Y, Su Z, Cheung T, Xiang Y T. Network analysis of  
674 depressive and anxiety symptoms in adolescents during and after the COVID-19  
675 outbreak peak. *J Affect Disord.* 2022;301: 463-471.
- 676 58. Borsboom D, Deserno MK, Rhemtulla M, Epskamp S, Fried EI, McNally RJ, et al.  
677 Network analysis of multivariate data in psychological science. *Nat Rev Methods*  
678 *Primers.* 2021;1(1):58.
- 679 59. Golino HF, Epskamp S. Exploratory graph analysis: A new approach for estimating  
680 the number of dimensions in psychological research. Voracek M, organizador. *PLoS*  
681 *ONE.* 2017;12(6):e0174035.
- 682 60. Golino H, Shi D, Christensen AP, Garrido LE, Nieto MD, Sadana R, et al.  
683 Investigating the performance of exploratory graph analysis and traditional  
684 techniques to identify the number of latent factors: A simulation and tutorial.

- 685 Psychol Methods. 2020;25(3):292–320.
- 686 61. Bairagi V, Munot MV. Research methodology: A practical and scientific approach.  
687 CRC Press: Taylor & Francis Group; 2019.
- 688 62. Neuman WL. Social research methods: Qualitative and quantitative approaches. 7st  
689 ed. Pearson Education; 2014.
- 690 63. Kothari CR. Research Methodology: Methods and Techniques. New Age  
691 International Pvt. Ltd., Publishers; 2004.
- 692 64. Faul F, Erdfelder E, Buchner A, Lang A-G. Statistical power analyses using  
693 G\*Power 3.1: Tests for correlation and regression analyses. Behav Res Methods.  
694 2009;41(4):1149–60.
- 695 65. Bados A, Solanas A, Andrés R. Psychometric properties of the Spanish version of  
696 Depression, Anxiety and Stress Scales (DASS). [Propiedades psicométricas de la  
697 versión española de las Escalas de Depresión, Ansiedad y Estrés (DASS)].  
698 Psicothema, 17(4), 679–683.
- 699 66. Daza P, Novy DM, Stanley MA, Averill P. The Depression Anxiety Stress Scale-  
700 21: Spanish Translation and Validation with a Hispanic Sample. J Psychopathol  
701 Behav Assess. 2002;24(3):195–205.
- 702 67. Rosenthal R, Rosnow R L. Essentials of behavioral research: Methods and data  
703 analysis. 3rd ed. McGraw Hill; 2008.
- 704 68. Lovibond PF, Lovibond SH. The structure of negative emotional states: Comparison  
705 of the Depression Anxiety Stress Scales (DASS) with the Beck Depression and  
706 Anxiety Inventories. Behav Res Ther. 1995;33(3):335–43.
- 707 69. Vignola RCB, Tucci AM. Adaptation and validation of the depression, anxiety and  
708 stress scale (DASS) to Brazilian Portuguese. J Affect Disord. 2014;155:104–9.
- 709 70. Field A. Discovering Statistics Using IBM SPSS Statistics. 5th ed. Sage; 2018.
- 710 71. Fortunato S. Community detection in graphs. Phys Rep, 2010; 486: 3–5, 75–174.  
711 doi: 10.1016/j.physrep.
- 712 72. Friedman JH, Hastie T, Tibshirani R. Sparse inverse covariance estimation with the  
713 graphical lasso. Biostatistics, 2008; 9(3): 432–441.
- 714 73. Friedman JH, Hastie T, Tibshirani R. Glasso: graphical lasso-estimation of Gaussian  
715 graphical models. R package version 1.8. 2014.  
716 <https://CRAN.Rproject.org/package=glasso>.
- 717 74. Lauritzen SL. Graphical models. Clarendon Press; 1996 .
- 718 75. Chen J, Chen Z. Extended Bayesian information criteria for model selection with  
719 large model spaces. Biometrika. 2008;95(3):759–71.
- 720 76. Epskamp S, Borsboom D, Fried EI. Estimating psychological networks and their

- 721 accuracy: A tutorial paper. *Behav Res.* 2018;50(1):195–212.
- 722 77. Foygel R, Drton M. Extended Bayesian Information Criteria for Gaussian Graphical  
723 Models. *Adv Neural Inf Process Syst.* 2010; 23:2020-2028.
- 724 78. Pons P, Latapy M. Computing communities in large networks using random walks.  
725 *J Graph Algorithms Appl.* 2006;10: 191–218. doi: 10.7155/jgaa.00185.
- 726 79. Ward JH. Hierarchical clustering to optimise an objective function. *J Am Stat Assoc,*  
727 1963;58: 238–244.
- 728 80. Newman MG, Shin KE, Zuellig AR. Developmental risk factors in generalized  
729 anxiety disorder and panic disorder. *J Affect Disord.* 2016;206:94–102.
- 730 81. Csardi G, Nepusz T. The igraph software package for complex network research.  
731 *Int. j. complex syst.,* 2006; 1695: 1–9.  
732 [https://pdfs.semanticscholar.org/1d27/44b83519657f5f2610698a8ddd177ced4f5c.](https://pdfs.semanticscholar.org/1d27/44b83519657f5f2610698a8ddd177ced4f5c.pdf)  
733 pdf.
- 734 82. Hu L, Bentler PM. Cutoff criteria for fit indexes in covariance structure analysis:  
735 Conventional criteria versus new alternatives. *Struct Equ Modeling,* 1999; 6(1): 1–  
736 55.
- 737 83. Raykov T. Estimation of Composite Reliability for Congeneric Measures. *Appl*  
738 *Psychol Meas.* 1997;21(2):173–84.
- 739 84. Raykov T. Behavioral scale reliability and measurement invariance evaluation using  
740 latent variable modeling. *Behav. Ther.* 2004;35(2):299–331
- 741 85. Lovibond PF. Long-term stability of depression, anxiety, and stress syndromes. *Jour*  
742 *Abn Psychol.* 1998;107:520–526.
- 743 86. Schoevers RA, Beekman AT, Deeg DJ, Jonker C, van Tilburg W. Comorbidity and  
744 risk-patterns of depression, generalised anxiety disorder and mixed anxiety-  
745 depression in later life: results from the AMSTEL study. *Int J Geriatr Psychiatry*  
746 2003;18(11): 994–1001. doi:10.1002/gps.100.
- 747 87. Schoevers RA, Deeg DJH, van Tilburg W, Beekman ATF. Depression and  
748 Generalized Anxiety Disorder: Co-Occurrence and Longitudinal Patterns in Elderly  
749 Patients. *Am J Geriatr Psychiatry.* 2005;13(1):31–9.
- 750 88. Shea TL, Tennant A, Pallant JF. Rasch model analysis of the Depression, Anxiety  
751 and Stress Scales (DASS). *BMC Psychiatry.* 2009;9(1):21.
- 752 89. Antony MM, Bieling PJ, Cox BJ, Enns MW, Swinson RP. Psychometric properties  
753 of the 42-item and 21-item versions of the Depression Anxiety Stress Scales in  
754 clinical groups and a community sample. *Psychol Assess.* 1998;10(2):176–81.
- 755 90. Clara IP, Cox BJ, Enns MW. Confirmatory factor analysis of the depression-  
756 Anxiety-Stress Scales in depressed and anxious patients. *J Psychopathol Behav*  
757 *Assess.* 2001;23(1):61–7.

- 758 91. Silva AC, Ezequiel OS, Lucchetti ALG, DiLalla LF, Lucchetti G. Empathy, well-  
759 being, and mental health: do gender differences diminish by the end of medical  
760 school? *Women Health*. 2021;61(3):254–64.
- 761 92. World Health Organization (WHO). Depression and other common mental  
762 disorders: global health estimates. World Health Organization. 2017. Available  
763 from: <https://apps.who.int/iris/handle/10665/254610>
- 764 93. Musa R, Maskat R. Psychometric Properties of Depression Anxiety Stress Scale 21-  
765 item (DASS-21) Malay Version among a Big Sample Population.  
766 *Mediterr. J. Clin. Psychol*. 2020;8(1).
- 767 94. Gu H, Wen Z, Fan X. Investigating the Multidimensionality of the Work-Related  
768 Flow Inventory (WOLF): A Bifactor Exploratory Structural Equation Modeling  
769 Framework. *Front Psychol*. 2020;11:740.
- 770 95. Osman A, Wong JL, Bagge CL, Freedenthal S, Gutierrez PM, Lozano G. The  
771 Depression Anxiety Stress Scales-21 (DASS-21): Further Examination of  
772 Dimensions, Scale Reliability, and Correlates: Depression Anxiety Stress. *J Clin*  
773 *Psychol*. 2012;68(12):1322–38.
- 774 96. Parkitny L, McAuley JH, Walton D, Pena Costa LO, Refshauge KM, Wand BM, et  
775 al. Rasch analysis supports the use of the Depression, Anxiety, and Stress Scales to  
776 measure mood in groups but not in individuals with chronic low back pain. *J Clin*  
777 *Epidemiol*. 2012;65(2):189–98.
- 778 97. Tully PJ, Zajac IT, Venning AJ. The Structure of Anxiety and Depression in a  
779 Normative Sample of Younger and Older Australian Adolescents. *J Abnorm Child*  
780 *Psychol*. 2009;37(5):717–26.
- 781 98. Schmitt N. Uses and abuses of coefficient alpha. *Psychol Assess*. 1996;8(4):350–3.
- 782 99. Tavakol M, Dennick R. Making sense of Cronbach’s alpha. *Int J Medical Education*.  
783 2011;2:53–5.
- 784 100. Ali AM, Alkhamees AA, Hori H, Kim Y, Kunugi H. The Depression Anxiety Stress  
785 Scale 21: Development and Validation of the Depression Anxiety Stress Scale 8-  
786 Item in Psychiatric Patients and the General Public for Easier Mental Health  
787 Measurement in a Post COVID-19 World. *IJERPH*. 2021;18(19):10142.
- 788 101. Clark LA, Watson D. Theoretical and empirical issues in differentiating depression  
789 from anxiety. In: Becker J, Kleinman A, editors. *Psychosocial aspects of depression*,  
790 Hillsdale, NJ: Erlbaum; 1991. pp. 39–65.
- 791 102. Habibi M, Dehghani M, Pooravari M, Salehi S. Confirmatory Factor Analysis of  
792 Persian Version of Depression, Anxiety and Stress (DASS-42): Non-Clinical  
793 Sample. *Razavi Int J Med*. 2017;5(4): e12021. doi: 10.5812/rijm.
- 794 103. Gottschalk MG, Domschke K. Genetics of generalized anxiety disorder and related  
795 traits. *Dialogues Clin Neurosci*. 2017;19(2):159–68.
- 796 104. Olaya B, Moneta MV, Miret M, Ayuso-Mateos JL, Haro JM. Epidemiology of panic

- 797 attacks, panic disorder and the moderating role of age: Results from a population-  
798 based study. *J Affect Disord.* 2018;241:627–33.
- 799 105. American Psychiatric Association. Manual diagnóstico e estatístico de transtornos  
800 mentais. Vol. 3. Washington, DC: American Psychiatric Association; 1980.
- 801 106. Spitzer RL (1980). Classification of mental disorders and DSM-III. In: Kaplan HI,  
802 Freedman M, Sadock BJ, editors. *Comprehensive textbook of psychiatry*  
803 Williams and Wilkins; 1980. pp. 356-370.
- 804 107. Rapee RM. Distinctions between Panic Disorder and Generalised Anxiety Disorder:  
805 Clinical Presentation. *Aust N Z J Psychiatry.* 1985;19(3):227–32.
- 806 108. Asmundson GJ, Stein MB. Vagal attenuation in panic disorder: an assessment of  
807 parasympathetic nervous system function and subjective reactivity to respiratory  
808 manipulations. *Psychosom. Med.* 1994;56(3):187–93.
- 809 109. Hamm AO, Richter J, Pané-Farré CA. When the threat comes from inside the body:  
810 A neuroscience based learning perspective of the etiology of panic disorder. *Restor*  
811 *Neurol Neurosci.* 2014;32(1):79–93.
- 812 110. Holt PE, Andrews G. Hyperventilation and anxiety in panic disorder, social phobia,  
813 gad and normal controls. *Behav Res Ther.* 1989;27(4):453–60.
- 814 111. Islam MdS, Ferdous MostZ, Potenza MN. Panic and generalized anxiety during the  
815 COVID-19 pandemic among Bangladeshi people: An online pilot survey early in  
816 the outbreak. *J Affect Disord.* 2020;276:30–7.
- 817 112. Meuret AE, White KS, Ritz T, Roth WT, Hofmann SG, Brown TA. Panic attack  
818 symptom dimensions and their relationship to illness characteristics in panic  
819 disorder. *J. Psychiatr. Res.* 2006;40(6):520–7.
- 820 113. Na K-S, Cho S-E, Cho S-J. Machine learning-based discrimination of panic disorder  
821 from other anxiety disorders. *J Affect Disord.* 2021;278:1–4.
- 822 114. Perna G, Caldirola D. Is panic disorder a disorder of physical fitness? A heuristic  
823 proposal. *F1000Res.* 2018;7:294.
- 824 115. Hirsch CR, Krahé C, Whyte J, Krzyzanowski H, Meeten F, Norton S, et al. Internet-  
825 delivered interpretation training reduces worry and anxiety in individuals with  
826 generalized anxiety disorder: A randomized controlled experiment. *J Consult Clin*  
827 *Psychol.* 2021;89(7):575–89.
- 828 116. Ibiloglu AO, Caykoylu A. The comorbidity of anxiety disorders in bipolar I and  
829 bipolar II patients among Turkish population. *J Anxiety Disord.* 2011;25(5):661–7.
- 830 117. Wittchen H-U. DSM-III-R Generalized Anxiety Disorder in the National  
831 Comorbidity Survey. *Arch Gen Psychiatry.* 1994;51(5):355.
- 832 118. Hoehn-Saric R, McLeod DR, Funderburk F, Kowalski P. Somatic Symptoms and  
833 Physiologic Responses in Generalized Anxiety Disorder and Panic Disorder: An  
834 Ambulatory Monitor Study. *Arch Gen Psychiatry.* 2004;61(9):913.



- 835 119. Chalmers JA, Quintana DS, Abbott MJ-A, Kemp AH. Anxiety Disorders are  
836 Associated with Reduced Heart Rate Variability: A Meta-Analysis. *Front Psychiatry*  
837 2014; 5:80.
- 838 120. Tully PJ, Turnbull DA, Beltrame J, Horowitz J, Cosh S, Baumeister H, et al. Panic  
839 disorder and incident coronary heart disease: a systematic review and meta-  
840 regression in 1 131 612 persons and 58 111 cardiac events. *Psychol Med.*  
841 2015;45(14):2909–20.
- 842 121. Zou Z, Zhou B, Huang Y, Wang J, Min W, Li T. Differences in cytokines between  
843 patients with generalised anxiety disorder and panic disorder. *J Psychosom Res.*  
844 2020;133:109975.
- 845 122. Ball TM, Ramsawh HJ, Campbell-Sills L, Paulus MP, Stein MB. Prefrontal  
846 dysfunction during emotion regulation in generalized anxiety and panic disorders.  
847 *Psychol Med.* 2013;43(7):1475–86.
- 848 123. Buff C, Brinkmann L, Neumeister P, Feldker K, Heitmann C, Gathmann B, et al.  
849 Specifically altered brain responses to threat in generalized anxiety disorder relative  
850 to social anxiety disorder and panic disorder. *Neuroimage Clin.* 2016;12:698–706.
- 851 124. Gayete S, Giné A, Miret M, Ayuso-Mateos JL, Haro JM, Olaya B. Cognitive  
852 function associated with different diagnoses of anxiety disorders over the lifespan:  
853 Results from a Spanish representative sample. *J Anxiety Disord.* 2020;75:102296.
- 854 125. Haby MM, Donnelly M, Corry J, Vos T. Cognitive Behavioural Therapy for  
855 Depression, Panic Disorder and Generalized Anxiety Disorder: A Meta-Regression  
856 of Factors that May Predict Outcome. *Aust N Z J Psychiatry.* 2006;40(1):9–19.
- 857 126. Clark DA, Beck AT. *Cognitive Therapy of Anxiety disorders: Science and Practice.*  
858 Guilford Press; 2010.
- 859 127. Barlow DH, Allen LB, Basden, SL. Psychological treatments for panic disorders,  
860 phobias, and generalized anxiety disorder. In: Nathan PE, Gorman JM, editors. *A*  
861 *guide to treatments that work.* Oxford University Press; 2007. pp. 351–394.
- 862 128. Otto MW, Smits JA, Reese HE. Cognitive-Behavioral Therapy for the Treatment of  
863 Anxiety Disorders. *J Clin Psychiatry.* 2004; 65(5): 34-41.
- 864 129. Montero-Marin J, Garcia-Campayo J, López-Montoyo A, Zabaleta-del-Olmo E,  
865 Cuijpers P. Is cognitive-behavioural therapy more effective than relaxation therapy  
866 in the treatment of anxiety disorders? A meta-analysis. *Psychol Med.*  
867 2018;48(9):1427–36.
- 868 130. Johnson PL, Federici LM, Shekhar A. Etiology, triggers and neurochemical circuits  
869 associated with unexpected, expected, and laboratory-induced panic attacks.  
870 *Neurosci Biobehav Rev.* 2014;46:429–54.
- 871 131. Draheim AA, Anderson PL. Does cognitive behavioral therapy for anxiety disorders  
872 improve threat reappraisal?: A meta-analysis. *J Behav Cogn Ther.* 2021;31(2):125–  
873 35.

- 874 132. Öst L-G, Westling BE. Applied relaxation vs cognitive behavior therapy in the  
875 treatment of panic disorder. *Behav Res Ther.* 1995;33(2):145–58.
- 876 133. Öst L-G, Breitholtz E. Applied relaxation vs. cognitive therapy in the treatment of  
877 generalized anxiety disorder. *Behav. Res. Ther.* 2000;38(8):777–90.
- 878 134. van Dis EAM, van Veen SC, Hagedaars MA, Batelaan NM, Bockting CLH, van den  
879 Heuvel RM, et al. Long-term Outcomes of Cognitive Behavioral Therapy for  
880 Anxiety-Related Disorders: A Systematic Review and Meta-analysis. *JAMA*  
881 *Psychiatry.* 2020;77(3):265.
- 882 135. Fried EI. Studying mental disorders as systems, not syndromes. *PsyArXiv*; 2021.  
883 Disponível em: <https://osf.io/k4mhv>.
- 884 136. Christensen AP, Golino H. On the equivalency of factor and network loadings.  
885 *Behav Res.* 2021;53(4):1563–80.

**Figure 1**

a)

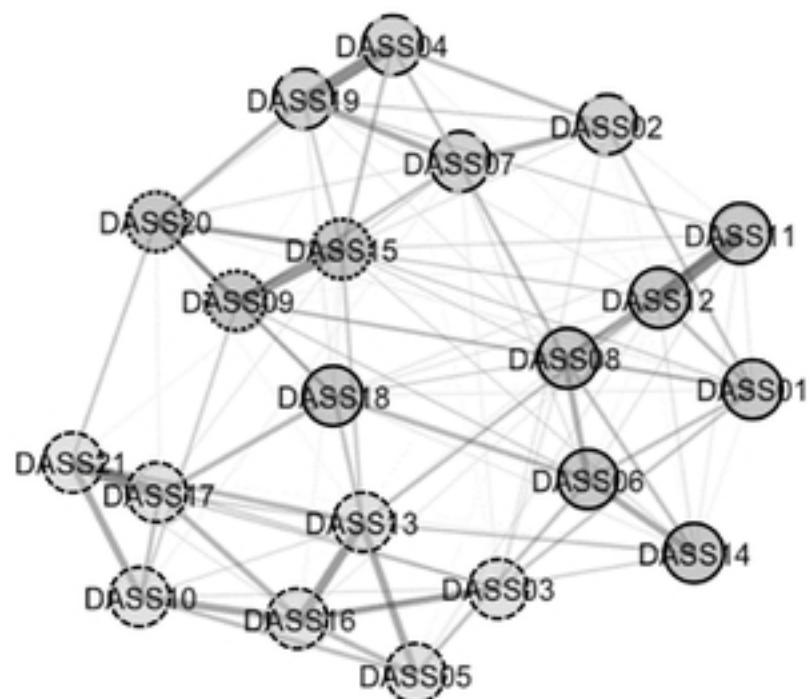

b)

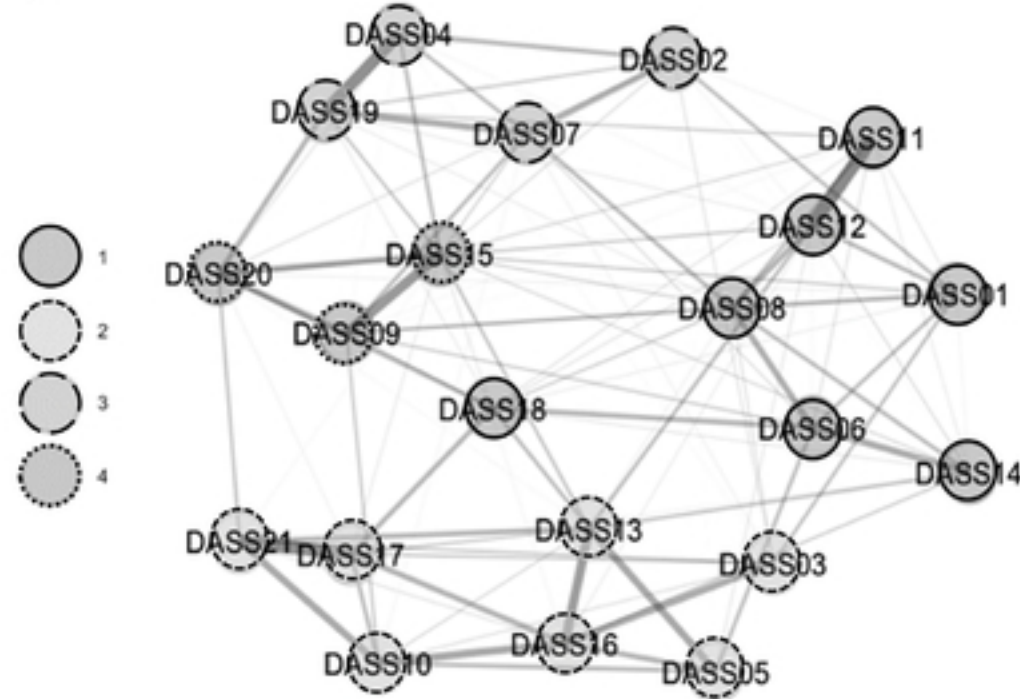

*Caption for artwork for figure 1:*

- 1 = red;
- 2 = blue;
- 3 = green, and
- 4 = orange

Figure 2

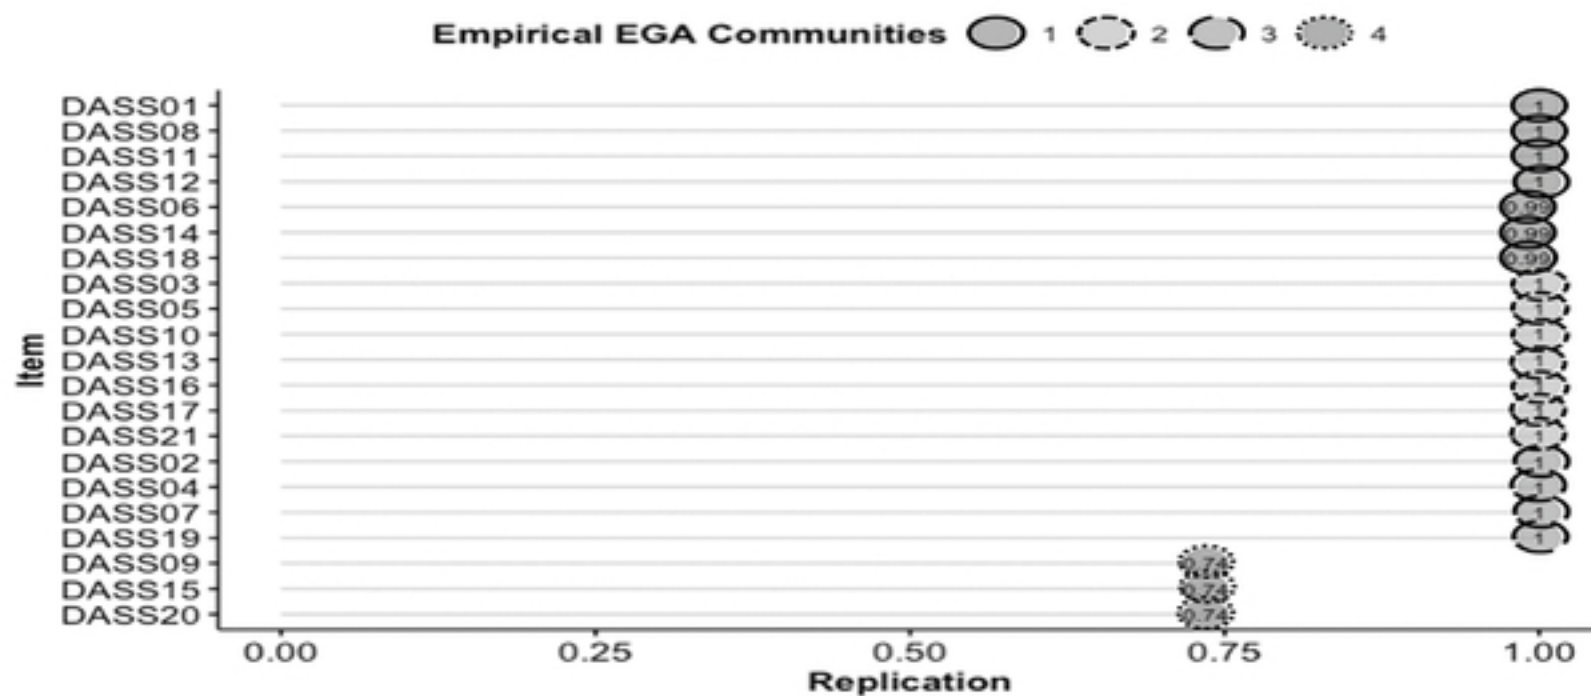

Caption for artwork for figure 2:

- 1 = red;
- 2 = blue;
- 3 = green, and
- 4 = orange.





|                                                                                                                                 |      |      |      |       |        |        |      |      |       |       |        |         |      |
|---------------------------------------------------------------------------------------------------------------------------------|------|------|------|-------|--------|--------|------|------|-------|-------|--------|---------|------|
| Single                                                                                                                          | 1760 | 63.1 |      |       |        | 772    | 63.0 |      |       |       |        |         |      |
| Married/Civil partnership                                                                                                       | 850  | 30.5 |      |       |        | 408    | 33.3 |      |       |       |        |         |      |
| Non-respondents                                                                                                                 | 181  | 6.5  |      |       |        | 46     | 3.8  |      |       |       |        |         |      |
| Brazilian region                                                                                                                |      |      |      |       |        |        |      |      |       |       |        |         |      |
| North                                                                                                                           | 19   | 2.3  |      |       |        | 10     | 0.3  |      |       |       |        |         |      |
| Northeast                                                                                                                       | 77   | 9.5  |      |       |        | 36     | 0.3  |      |       |       |        |         |      |
| Center-west                                                                                                                     | 34   | 4.2  |      |       |        | 19     | 0.4  |      |       |       |        |         |      |
| Southeast                                                                                                                       | 628  | 78.1 |      |       |        | 280    | 5.7  |      |       |       |        |         |      |
| South                                                                                                                           | 46   | 5.7  |      |       |        | 40     | 1.1  |      |       |       |        |         |      |
| Non-respondents                                                                                                                 | 1987 | 71.2 |      |       |        | 841    | 68.6 |      |       |       |        |         |      |
| DASS-21 items                                                                                                                   |      |      |      |       |        |        |      |      |       |       |        |         |      |
| 01 - I found it hard to wind down                                                                                               |      |      | 1.48 | 0.926 | 0.110  | -0.840 |      | 1.22 | 0.942 | 0.398 | -0.712 | < .001* | 0.28 |
| 02 - I was aware of dryness of my mouth                                                                                         |      |      | 0.95 | 1.058 | 0.714  | -0.822 |      | 0.71 | 0.969 | 1.109 | -0.003 | < .001* | 0.24 |
| 03 - I couldn't seem to experience any positive feeling at all                                                                  |      |      | 0.74 | 0.881 | 0.919  | -0.147 |      | 0.66 | 0.864 | 1.117 | 0.308  | .008*   | 0.09 |
| 04 - I experienced breathing difficulty (e.g., excessively rapid breathing, breathlessness in the absence of physical exertion) |      |      | 0.87 | 1.028 | 0.830  | -0.606 |      | 0.56 | 0.889 | 1.467 | 1.071  | < .001* | 0.32 |
| 05 - I found it difficult to work up the initiative to do things                                                                |      |      | 1.74 | 1.042 | -0.219 | -1.172 |      | 1.44 | 1.059 | 0.099 | -1.207 | < .001* | 0.29 |
| 06 - I tended to over-react to situations                                                                                       |      |      | 1.44 | 1.028 | 0.117  | -1.123 |      | 1.11 | 1.011 | 0.488 | -0.890 | < .001* | 0.32 |
| 07 - I experienced trembling (e.g., in the hands)                                                                               |      |      | 0.64 | 0.963 | 1.298  | 0.411  |      | 0.43 | 0.837 | 1.892 | 2.490  | < .001* | 0.23 |
| 08 - I felt that I was using a lot of nervous energy                                                                            |      |      | 1.38 | 1.017 | 0.194  | -1.066 |      | 1.05 | 0.992 | 0.558 | -0.780 | < .001* | 0.33 |
| 09 - I was worried about situations in which I might panic and make a fool of myself                                            |      |      | 1.07 | 1.101 | 0.544  | -1.093 |      | 0.74 | 0.997 | 1.089 | -0.102 | < .001* | 0.31 |
| 10 - I felt that I had nothing to look forward to                                                                               |      |      | 0.99 | 1.063 | 0.663  | -0.875 |      | 0.86 | 1.005 | 0.833 | -0.551 | < .001* | 0.13 |
| 11 - I found myself getting agitated                                                                                            |      |      | 1.61 | 1.004 | -0.087 | -1.078 |      | 1.35 | 1.031 | 0.194 | -1.109 | < .001* | 0.26 |
| 12 - I found it difficult to relax                                                                                              |      |      | 1.81 | 0.993 | -0.286 | -1.035 |      | 1.47 | 1.024 | 0.079 | -1.121 | < .001* | 0.38 |
| 13 - I felt down-hearted and blue                                                                                               |      |      | 1.59 | 1.060 | -0.031 | -1.237 |      | 1.22 | 1.062 | 0.362 | -1.113 | < .001* | 0.35 |

|                                                                                                                                            |              |               |              |               |              |               |              |               |                   |             |
|--------------------------------------------------------------------------------------------------------------------------------------------|--------------|---------------|--------------|---------------|--------------|---------------|--------------|---------------|-------------------|-------------|
| 14 - I was intolerant of anything that kept me from getting on with what I was doing                                                       | 1.32         | 1.016         | 0.251        | -1.041        | 1.13         | 1.012         | 0.457        | -0.915        | < .001*           | 0.19        |
| 15 - I felt I was close to panic                                                                                                           | 0.98         | 1.054         | 0.696        | -0.801        | 0.64         | 0.938         | 1.284        | 0.481         | < .001*           | 0.34        |
| 16 - I was unable to become enthusiastic about anything                                                                                    | 1.20         | 1.061         | 0.385        | -1.094        | 0.97         | 1.017         | 0.686        | -0.723        | < .001*           | 0.22        |
| 17 - I felt I wasn't worth much as a person                                                                                                | 1.07         | 1.146         | 0.580        | -1.153        | 0.85         | 1.068         | 0.920        | -0.552        | < .001*           | 0.20        |
| 18 - I felt that I was rather touchy                                                                                                       | 1.84         | 0.993         | -0.322       | -1.024        | 1.27         | 1.059         | 0.341        | -1.102        | < .001*           | 0.56        |
| 19 - I was aware of the beating of my heart in the absence of physical exertion (e.g., sense of heart rate increase, heart missing a beat) | 0.98         | 1.067         | 0.681        | -0.868        | 0.72         | 0.976         | 1.161        | 0.150         | < .001*           | 0.25        |
| 20 - I felt scared without any good reason                                                                                                 | 1.13         | 1.086         | 0.481        | -1.095        | 0.71         | 0.977         | 1.178        | 0.168         | < .001*           | 0.41        |
| 21 - I felt that life was meaningless                                                                                                      | 0.92         | 1.115         | 0.808        | -0.820        | 0.77         | 1.041         | 1.062        | -0.246        | < .001*           | 0.14        |
| <b>Total</b>                                                                                                                               | <b>25.78</b> | <b>15.335</b> | <b>0.364</b> | <b>-0.793</b> | <b>19.88</b> | <b>14.526</b> | <b>0.697</b> | <b>-0.323</b> | <b>&lt; .001*</b> | <b>0.40</b> |

*Note.* This table presents descriptive analyses of the sociodemographic and DASS-21 items divided by gender, <sup>a</sup> N = 2791 (69,48%), <sup>b</sup> N = 1226 (30,52%), n = sample, % = percentage, M = mean, SD = standard deviation, sk = skewness, kt = kurtosis, \*p < .001, d = Cohen's d effect size estimator (small = 0.2; medium = 0.5; large = 0.8, and very large = 1.3, Rosenthal & Rosnow, 2008).



**Table 2***Factor Loading and Coefficient Determination of DASS Tested Models*

| Factors    | Single Factor Models                       |                |                                |                | Two factor models                                                                       |                |                                           |                | Three factor model                                                                                             |                | Four factor model                                             |                |                |                |
|------------|--------------------------------------------|----------------|--------------------------------|----------------|-----------------------------------------------------------------------------------------|----------------|-------------------------------------------|----------------|----------------------------------------------------------------------------------------------------------------|----------------|---------------------------------------------------------------|----------------|----------------|----------------|
|            | Ruiz et al. (2017); Kyriazos et al. (2018) |                | Gonzales-Riviera et al. (2020) |                | Lovibond (1998); Schoever et al. (2003); Schoevers et al. (2005); Gloster et al. (2008) |                | Gloster et al. (2008); Ruiz et al. (2017) |                | Lovibond & Lovibond (2004); Page et al. (2007); Shea et al. (2009); Alfonsso et al. (2017); Ruiz et al. (2017) |                | Antony et al. (1998); Clara et al. (2001); Daza et al. (2002) |                | New proposal   |                |
|            | M1                                         |                | M2                             |                | M3                                                                                      |                | M4                                        |                | M5                                                                                                             |                | M6                                                            |                | M7             |                |
|            | Factor loading                             | R <sup>2</sup> | Factor loading                 | R <sup>2</sup> | Factor loading                                                                          | R <sup>2</sup> | Factor loading                            | R <sup>2</sup> | Factor loading                                                                                                 | R <sup>2</sup> | Factor loading                                                | R <sup>2</sup> | Factor loading | R <sup>2</sup> |
| Stress     |                                            |                |                                |                |                                                                                         |                |                                           |                |                                                                                                                |                |                                                               |                |                |                |
| 01         | 0.62*                                      | 0.44           |                                |                | 0.69*                                                                                   | 0.48           | 0.67*                                     | 0.45           | 0.68*                                                                                                          | 0.46           | 0.65*                                                         | 0.42           | 0.69*          | 0.48           |
| 06         | 0.72*                                      | 0.48           |                                |                | 0.73*                                                                                   | 0.53           | 0.70*                                     | 0.49           | 0.71*                                                                                                          | 0.50           | 0.76*                                                         | 0.57           | 0.73*          | 0.53           |
| 08         | 0.80*                                      | 0.62           |                                |                | 0.82*                                                                                   | 0.69           | 0.79*                                     | 0.63           | 0.80*                                                                                                          | 0.65           | 0.84*                                                         | 0.70           | 0.82*          | 0.68           |
| 11         | 0.67*                                      | 0.43           |                                |                | 0.69*                                                                                   | 0.48           | 0.66*                                     | 0.44           | 0.67*                                                                                                          | 0.46           | 0.71*                                                         | 0.50           | 0.69*          | 0.48           |
| 12         | 0.76*                                      | 0.56           |                                |                | 0.79*                                                                                   | 0.62           | 0.76*                                     | 0.57           | 0.76*                                                                                                          | 0.58           | 0.80*                                                         | 0.64           | 0.78*          | 0.62           |
| 14         | 0.68*                                      | 0.44           |                                |                | 0.69*                                                                                   | 0.48           | 0.67*                                     | 0.45           | 0.67*                                                                                                          | 0.45           | 0.71*                                                         | 0.50           | 0.69*          | 0.48           |
| 18         | 0.76*                                      | 0.52           |                                |                | 0.76*                                                                                   | 0.57           | 0.73*                                     | 0.54           | 0.73*                                                                                                          | 0.54           | 0.80*                                                         | 0.64           | 0.76*          | 0.57           |
| Depression |                                            |                |                                |                |                                                                                         |                |                                           |                |                                                                                                                |                |                                                               |                |                |                |
| 03         | 0.50*                                      | 0.31           | 0.59*                          | 0.31           | 0.57*                                                                                   | 0.32           | 0.57*                                     | 0.32           | 0.61*                                                                                                          | 0.37           | 0.53*                                                         | 0.28           | 0.61*          | 0.37           |
| 05         | 0.66*                                      | 0.39           | 0.68*                          | 0.36           | 0.63*                                                                                   | 0.39           | 0.63*                                     | 0.40           | 0.67*                                                                                                          | 0.45           | 0.71*                                                         | 0.50           | 0.67*          | 0.45           |
| 10         | 0.72*                                      | 0.47           |                                |                | 0.70*                                                                                   | 0.49           | 0.70*                                     | 0.49           | 0.75*                                                                                                          | 0.56           | 0.79*                                                         | 0.63           | 0.75*          | 0.56           |
| 13         | 0.87*                                      | 0.65           | 0.87*                          | 0.63           | 0.82*                                                                                   | 0.67           | 0.82*                                     | 0.67           | 0.87*                                                                                                          | 0.77           | 0.94*                                                         | 0.88           | 0.87*          | 0.77           |
| 16         | 0.80*                                      | 0.58           | 0.85*                          | 0.57           | 0.77*                                                                                   | 0.59           | 0.77*                                     | 0.59           | 0.82*                                                                                                          | 0.68           | 0.87*                                                         | 0.75           | 0.82*          | 0.68           |
| 17         | 0.81*                                      | 0.51           |                                |                | 0.73*                                                                                   | 0.53           | 0.72*                                     | 0.53           | 0.78*                                                                                                          | 0.61           | 0.88*                                                         | 0.77           | 0.78*          | 0.61           |
| 21         | 0.75*                                      | 0.47           |                                |                | 0.70*                                                                                   | 0.49           | 0.69*                                     | 0.48           | 0.74*                                                                                                          | 0.56           | 0.82*                                                         | 0.67           | 0.74*          | 0.56           |
| Anxiety    |                                            |                |                                |                |                                                                                         |                |                                           |                |                                                                                                                |                |                                                               |                |                |                |
| 02         | 0.58*                                      | 0.31           |                                |                | 0.57*                                                                                   | 0.32           | 0.60*                                     | 0.37           | 0.57*                                                                                                          | 0.33           | 0.63*                                                         | 0.39           | 0.66*          | 0.43           |
| 04         | 0.58*                                      | 0.33           | 0.69*                          | 0.39           | 0.58*                                                                                   | 0.34           | 0.63*                                     | 0.39           | 0.59*                                                                                                          | 0.35           | 0.63*                                                         | 0.39           | 0.68*          | 0.47           |

|                        |       |      |       |      |       |      |       |      |       |      |       |      |       |      |
|------------------------|-------|------|-------|------|-------|------|-------|------|-------|------|-------|------|-------|------|
| 07                     | 0.55* | 0.35 | 0.66* | 0.38 | 0.60* | 0.36 | 0.64* | 0.42 | 0.60* | 0.37 | 0.60* | 0.36 | 0.70* | 0.49 |
| 19                     | 0.70* | 0.44 | 0.77* | 0.48 | 0.67* | 0.46 | 0.72* | 0.52 | 0.68* | 0.46 | 0.76* | 0.57 | 0.79* | 0.63 |
| Anxiety/<br>new factor |       |      |       |      |       |      |       |      |       |      |       |      |       |      |
| 09                     | 0.79* | 0.53 | 0.78* | 0.54 | 0.74* | 0.55 | 0.79* | 0.62 | 0.74* | 0.56 | 0.86* | 0.74 | 0.78* | 0.62 |
| 15                     | 0.81* | 0.61 | 0.85* | 0.66 | 0.79* | 0.63 | 0.85* | 0.72 | 0.80* | 0.64 | 0.88* | 0.77 | 0.84* | 0.71 |
| 20                     | 0.78* | 0.53 | 0.77* | 0.55 | 0.74* | 0.54 | 0.79* | 0.62 | 0.74* | 0.55 | 0.85* | 0.72 | 0.78* | 0.61 |

*Note.* Confirmatory factor analysis comparing the current model generated by EGA with replications of others previously tested in the literature; satisfactory factor loadings  $\geq .40$ ;  $R^2$  = coefficient determination; \*  $p < .001$ ; M1 = Model 1: which features clustering of all 21 items from the depression, anxiety, and stress subscales; M2 = Model 2: clusters items 03, 05, 13, and 16 from the depression subscale, and items 04, 07, 09, 15, 19, and 20 from anxiety subscale; M3 = Model 3: encompassing items from depression and anxiety subscales as a factor differing from stress factor; M4 = Model 4: comprises the arrangement of the items from depression and stress subscales as a factor differing from anxiety factor; M5 = Model 5: encompassing items from anxiety and stress subscales as a factor differing from depression factor; M6 = Model 6: three factor model; items from depression, anxiety and stress subscales form specific factors, each one of them, setting a tridimensional model. M7 = Model 7: composed by four different factors consisting of depression and stress subscales, and the split between items 02, 04, 07, and 19, and 09, 15, and 20 from anxiety subscale.

**Table 3***Fit Indexes of Replicated and New DASS-21 Models*

| Model | $\chi^2$  | df  | CFI  | TLI  | RMSEA | 90% CI RMSEA | SRMR  |
|-------|-----------|-----|------|------|-------|--------------|-------|
| M1    | 2954.93*  | 189 | 0.99 | 0.98 | 0.060 | 0.040-0.070  | 0.060 |
| M2    | 1186.33*  | 35  | 0.98 | 0.97 | 0.080 | 0.080-0.090  | 0.070 |
| M3    | 2451.094* | 188 | 0.98 | 0.98 | 0.055 | 0.053-0.057  | 0.074 |
| M4    | 2221.741* | 188 | 0.98 | 0.98 | 0.052 | 0.050-0.054  | 0.050 |
| M5    | 1564.710* | 188 | 0.99 | 0.99 | 0.043 | 0.041-0.045  | 0.043 |
| M6    | 1060.12*  | 186 | 1.00 | 0.99 | 0.030 | 0.030-0.040  | 0.030 |
| M7    | 899.09    | 183 | 1.00 | 1.00 | 0.030 | 0.029-0.033  | 0.030 |

*Note.* Confirmatory fit indices for each of the tested DASS-21 models, including the one with a new fourth dimension; the name of the models, factors, subscales and comprising items were described in table 2;  $\chi^2$  = chi-square; \* p < .01; df = degrees of freedom; CFI = Comparative Fit Index; TLI = Tucker Lewis Index; RMSEA = Root-Mean-Square Error of Approximation; CI RMSEA = Confidence Interval of Root-Mean-Square Error of Approximation; SRMR = Standardized Root Mean Square Residual.

**Table 4***Factorial Invariance for DASS-21 New Model Applied for Gender and Type of Activity Performed by Participants*

| Model                             | Model fit |     |      |      |       | Model difference |              |              |
|-----------------------------------|-----------|-----|------|------|-------|------------------|--------------|--------------|
|                                   | $\chi^2$  | df  | CFI  | TLI  | RMSEA | 90% CI RMSEA     | $\Delta$ CFI | $\Delta$ TLI |
| <b>Gender</b>                     |           |     |      |      |       |                  |              |              |
| M1: Configural                    | 922.999   | 326 | 1.00 | 1.00 | .030  | .028-.032        | -            | -            |
| M2: Weak                          | 1070.289* | 343 | .996 | .995 | .032  | .030-.035        | .004         | .005         |
| M3: Strong                        | 1174.618* | 359 | .995 | .995 | .034  | .032-.036        | .001         | .000         |
| M4: Strict                        | 1307.507* | 421 | .995 | .995 | .032  | .030-.034        | .000         | .000         |
| <b>Type of activity performed</b> |           |     |      |      |       |                  |              |              |
| M1: Configural                    | 162.072   | 108 | 1.00 | 1.00 | .030  | .030-.034        | -            | -            |
| M2: Weak                          | 181.888*  | 129 | .999 | .999 | .033  | .031-.034        | .001         | .001         |
| M3: Strong                        | 186.007*  | 139 | .996 | .995 | .032  | .032-.034        | .003         | .004         |
| M4: Strict                        | 207.536*  | 152 | .998 | .998 | .038  | .024-.051        | .002         | .003         |

*Note.* Factorial invariance considering gender and type of activity performed by participants;  $\chi^2$  = chi-square; \*p < .001; df = degrees of freedom; CFI = Comparative Fit Index; TLI = Tucker Lewis Index; RMSEA = Root-Mean-Square Error of Approximation; CI RMSEA = Confidence Interval of Root-Mean-Square Error of Approximation;  $\Delta$ CFI = Difference between Comparative Fit Indices;  $\Delta$ TLI = the difference between Tucker Lewis Indices.
